# Supplementary material
Source: PubMed Central journal article supplement (PMC2586057)
Supplement: NIHMS62861-supplement-4File003.pdf [file NIHMS62861-supplement-4File003.pdf]

# Reversibility Effects on the Stereoselectivity of Pt(II)-Mediated Cascade Poly-ene Cyclizations

## Supporting Information

*Jeremiah A. Feducia, Michel R. Gagné*

*Department of Chemistry, University of North Carolina at Chapel Hill,  
Chapel Hill, North Carolina 27599-3290*

### Table of Contents

1. Experimental Procedures
2. Figure S1.  $^{31}\text{P}$  NMR of cyclization of (*E:Z*)-**1** with  $(\text{EtPPPEt})\text{Pt}^{2+}$  in  $\text{CH}_2\text{Cl}_2$ .
3. Figure S2.  $^{31}\text{P}$  NMR of  $[(\text{EtPPPEt})\text{Pt}(1\text{-hexene})][\text{BF}_4]_2$ .
4. Figure S3.  $^{31}\text{P}$  NMR of cyclization of (*E:Z*)-**1** with  $(\text{EtPPP})\text{Pt}^{2+}$  in  $\text{MeNO}_2$ .
5. Table S1.  $^{31}\text{P}$  NMR Data Table.
6. Table S2. Acid or base additive effects on the cyclization of (*E:Z*)-**1**.
7. Crystallographic Data for **4** (Table S3-S7, Figure S3)
8. Crystallographic Data for **8** (Table S8-S13, Figure S4)
9. Crystallographic Data for **9** (Table S14-S19, Figure S5)
10. NMR Spectra for Isolated Compounds

### Experimental Procedures

**General Methods.** All reactions were performed under an inert atmosphere of  $\text{N}_2$  using standard Schlenk techniques or using an MBraun Lab-Master 100 glove box. Solvents for equilibrium studies ( $\text{CH}_2\text{Cl}_2$ ,  $\text{ClCH}_2\text{CH}_2\text{Cl}$ ,  $\text{MeNO}_2$ ,  $\text{EtNO}_2$ ) were dried over  $\text{CaH}_2$ , distilled, degassed by several successive freeze-pump-thaw cycles and stored in a

glove box. All starting [(RPPPR')PtMe][BF<sub>4</sub>] and [(RPPPR')Pt-I][I] compounds,<sup>1</sup> [Ph<sub>2</sub>NH<sub>2</sub>][BF<sub>4</sub>]<sup>2</sup>, [Ph<sub>2</sub>NMeH][BF<sub>4</sub>]<sup>2</sup> and **1**<sup>3</sup> were prepared by published procedures. Diphenylamine was purchased from Aldrich, distilled over CaH<sub>2</sub>, and stored over 4Å molecular sieves in a glove box. 2,3-dihydropyran was purchased from Aldrich and distilled prior to use. NMR spectra were recorded on a Bruker Avance 400 MHz or Bruker Avance 500 MHz spectrometer; chemical shifts are given in ppm and are referenced to residual solvent resonances (<sup>1</sup>H and <sup>13</sup>C). NMR spectra to determine the structure of the products from the cyclization of **10** were recorded on an 800 MHz Varian Inova NMR Spectrometer at Duke University (Durham, NC). <sup>31</sup>P NMR chemical shifts are referenced to an external PPh<sub>3</sub> standard in C<sub>6</sub>D<sub>6</sub> sealed in a capillary tube.

**E-2:** Prepared by a similar procedure to **1**<sup>3</sup> using 2,3-dihydropyran in place of dihydrofuran. The crude material was separated by silica gel chromatography using 4:1 hexanes/EtOAc to yield 647.6 mg (54%) of a pale yellow oil; <sup>1</sup>H NMR: (400 MHz, CDCl<sub>3</sub>) δ 7.72 (d, 2 H, *J* = 7.6 Hz), 7.28 (d, 2 H, *J* = 7.6 Hz), 5.73 (m, 1 H), 4.94 (m, 3 H), 4.37 (br, 1 H), 2.91 (q, 2 H, *J* = 6.8 Hz), 2.41 (s, 3 H), 2.08 (m, 2 H), 1.96 (m, 4 H), 1.58 (s, 3 H), 1.48 (m, 2 H); <sup>13</sup>C NMR (100 MHz, CDCl<sub>3</sub>) δ 143.2, 138.5, 136.9, 135.7, 129.6, 127.0, 123.1, 114.3, 42.8, 38.9, 32.2, 29.4, 24.8, 21.5, 15.9. HRMS (ESI) [M+K]<sup>+</sup>/*z* calc. 346.124, found 346.120.

**E-7:** Prepared by a published procedure<sup>3</sup> using 3-methyl-2,3-dihydrofuran.<sup>4</sup> The crude material was purified by silica gel chromatography using 9:1 hexanes/EtOAc to yield 797.1 mg (65%) of a clear oil; <sup>1</sup>H NMR: (400 MHz, CDCl<sub>3</sub>) δ 5.73 (m, 1 H), 4.96

<sup>1</sup> Feducia, J. A.; Campbell, A. N.; Anthis, J. W.; Gagné, M. R. *Organometallics* **2006**, *25*, 3114-3117.

<sup>2</sup> Forschner, T. C.; Cutler, A. R. *Organometallics* **1985**, *4*, 1247-1257.

<sup>3</sup> Koh, J. H.; Mascarenhas, C.; Gagné, M. R. *Tetrahedron* **2004**, *60*, 7405-7410.

<sup>4</sup> Chan, J.; Jamison, T. F. *J. Am. Chem. Soc.* **2004**, *126*, 10682-10691.

(m, 2 H), 4.85 (d, 1 H,  $J = 9.6$  Hz), 3.45 (m, 1 H), 3.25 (t, 1 H,  $J = 9.2$  Hz), 2.60 (m, 1 H), 2.12 (m, 4 H), 1.63 (s, 3 H), 1.41 (m, 1 H), 0.92 (d, 3 H,  $J = 10.8$  Hz);  $^{13}\text{C}$  NMR (100 MHz,  $\text{CDCl}_3$ )  $\delta$  158.0, 138.2, 115.2, 101.4, 77.4, 37.7, 31.2, 27.8, 21.2. HRMS (ESI)  $[\text{M}+\text{Na}]/z$  calc. 177.126, found 177.127.

***E,E*-10**: Prepared by a published procedure<sup>3</sup> using 3-methyl-2,3-dihydrofuran.<sup>4</sup> The crude material was purified by silica gel chromatography using 9:1 hexanes/EtOAc to yield 370.4 mg (53%) of a clear oil;  $^1\text{H}$  NMR: (400 MHz,  $\text{CDCl}_3$ )  $\delta$  5.77 (m, 1 H), 5.07 (m, 1 H), 4.98 (d, 1 H,  $J = 17.2$  Hz), 4.90 (d, 1 H,  $J = 10.4$  Hz), 4.84 (d, 1 H,  $J = 9.2$  Hz), 3.44 (m, 1 H), 3.26 (t, 1 H,  $J = 9.2$  Hz), 2.59 (m, 1 H), 2.07 (m, 8 H), 1.64 (s, 3 H), 1.58 (s, 3 H), 1.38 (m, 1 H), 0.89 (d, 3 H,  $J = 6.8$  Hz);  $^{13}\text{C}$  NMR (100 MHz,  $\text{CDCl}_3$ )  $\delta$  139.1, 138.3, 135.3, 127.6, 124.6, 114.7, 68.3, 40.2, 39.4, 35.8, 32.8, 26.8, 17.4, 16.9, 16.4. HRMS (ESI)  $[\text{M}+\text{Na}]/z$  calc. 245.1881, found 245.1877.

**4**: In a glovebox, (PPP) $\text{PtI}_2$  (0.10 mmol) and  $\text{AgBF}_4$  (0.23 mmol) were weighed out into a glass vial. Dichloromethane was added to this and the solution was stirred for 10 minutes upon which (***E:Z***-1) (0.11 mmol) was added to the solution dropwise. After an additional 10 minutes of stirring  $\text{AgI}$  began to precipitate and diphenylmethanamine (0.11 mmol) was added to the suspension. This mixture was shielded from light and stirred for 2 hours. The suspension was filtered through celite to remove  $\text{AgI}$ , washed three times with a saturated  $\text{NaHCO}_3$  solution, dried over  $\text{MgSO}_4$  and concentrated *in vacuo*. The product was precipitated three times from dichloromethane and  $\text{Et}_2\text{O}$  and dried to give 75.4 mg (68%) of a white solid;  $^1\text{H}$  NMR (400 MHz,  $\text{CDCl}_3$ ):  $\delta$  7.78 (m, 2 H); 7.51 (m, 25 H); 7.20 (d, 2 H,  $J = 8.0$  Hz); 3.35 (m, 3 H); 2.87 (m, 3 H); 2.43 (m, 7 H);

1.79 (m, 1 H); 1.43 (m, 1 H); 1.29 (m, 4 H); 0.97 (m, 4 H); 0.80 (s, 3 H).  $^{31}\text{P}\{^1\text{H}\}$  NMR (162 MHz,  $\text{CDCl}_3$ ):  $\delta$  90.0 (s,  $^3J_{\text{Pt-P}} = 1319$  Hz, 1P); 44.6 (s,  $^3J_{\text{Pt-P}} = 2991$  Hz, 2P).

**8:** In a glovebox, (PPP)PtI<sub>2</sub> (0.53 mmol) and AgBF<sub>4</sub> (0.133 mmol) were weighed out into a glass vial. Dichloromethane (15 mL) and acetone (1.06 mmol) was added to this and the solution was stirred for 1 hour upon which a 3 mL solution of **E,7** (0.58 mmol) and Ph<sub>2</sub>NMe (1.06 mmol) in dichloromethane was added to the solution dropwise. This mixture was stirred for 1 hour. The suspension was filtered through celite to remove AgI, washed three times with a saturated NaHCO<sub>3</sub> solution, washed once with brine and dried over MgSO<sub>4</sub>. The filtrate from drying was concentrated *in vacuo*. The product was precipitated three times from dichloromethane and Et<sub>2</sub>O and dried to give 380.3 mg (74%) of a white solid. Crystals suitable for X-ray crystallography were grown by vapor diffusion with dichloromethane and pentane;  $^1\text{H}$  NMR (400 MHz,  $\text{CDCl}_3$ ):  $\delta$  7.77 (m, 2 H); 7.48 (m, 23 H); 3.30 (m, 2 H); 2.98 (t, 1 H,  $J = 8.0$  Hz); 2.79 (m, 2 H); 2.29 (m, 5 H); 1.49 (m, 3 H); 1.22 (m, 2 H); 0.87 (m, 3 H); 0.56 (d, 3 H,  $J = 10.0$  Hz); 0.44 (t, 1 H,  $J = 11.6$  Hz); 0.06 (s, 3 H).  $^{31}\text{P}\{^1\text{H}\}$  NMR (162 MHz,  $\text{CDCl}_3$ ):  $\delta$  89.6 (s, 1 P,  $J_{\text{Pt-P}} = 1316$  Hz); 41.1 (d, 2 P,  $J_{\text{P-P}} = 22$  Hz,  $J_{\text{Pt-P}} = 3001$  Hz).

**9:** In a glovebox, (EtPPP)PtI<sub>2</sub> (0.11 mmol) and AgBF<sub>4</sub> (0.29 mmol) were weighed out into a glass vial. Dichloromethane (8 mL) was added to this and the solution was stirred for 10 minutes upon which **E-7** (0.13 mmol) was added to the solution dropwise. After an additional 10 minutes of stirring AgI began to precipitate and diphenylmethylamine (0.13 mmol) was added to the suspension. This mixture was stirred for 48 hours. The suspension was filtered through celite to remove AgI, washed three times with a saturated NaHCO<sub>3</sub> solution, dried over MgSO<sub>4</sub> and concentrated *in*

*vacuo*. The product was precipitated three times from dichloromethane and Et<sub>2</sub>O and dried to give 53.6 mg (51%) of a white solid. Crystals suitable for X-ray crystallography were grown by vapor diffusion with dichloromethane and diethyl ether; <sup>1</sup>H NMR (500 MHz, CDCl<sub>3</sub>): δ 7.68 (m, 4 H); 7.59 (m, 6 H); 7.43 (m, 10 H); 3.70 (t, 1 H, *J* = 8.0 Hz); 3.45 (m, 2 H); 3.09 (t, 1 H, *J* = 8.0 Hz); 2.65 (m, 2 H); 2.34 (m, 5 H); 1.77 (m, 1 H); 1.67 (m, 2 H); 1.33 (m, 2 H); 1.03 (m, 1 H); 0.85 (m, 4 H); 0.78 (m, 2 H); 0.71 (m, 1 H); 0.57 (d, 3 H, *J* = 6.5 Hz); 0.48 (s, 3 H). <sup>31</sup>P{<sup>1</sup>H} NMR (162 MHz, CDCl<sub>3</sub>): δ 90.9 (s, <sup>3</sup>*J*<sub>Pt-P</sub> = 1241 Hz, 1P); 43.8 (s, <sup>3</sup>*J*<sub>Pt-P</sub> = 3012 Hz, 2P).

**Typical Procedure for Equilibrium Measurements.** A solution of [(RPPPR)PtMe][BF<sub>4</sub>] (0.008 mmol), [Ph<sub>2</sub>NH<sub>2</sub>][BF<sub>4</sub>] (0.08 mmol), and (*E:Z*)-**1** or *E-2* (0.08 mmol) in 300 μL of CH<sub>3</sub>NO<sub>2</sub><sup>5</sup> (or other solvent for Table 1) was prepared in a glove box and sealed in a J-Young NMR tube at 25(1) °C. The reaction was monitored by <sup>31</sup>P NMR until no change in peak intensity was observed.

**Equilibrium Calculations.** Equilibrium constants were calculated from the average molar ratios of the Pt(η<sup>2</sup>-alkenyl) and Pt(alkyl) complexes using the equation below. [Pt] was obtained by determining the ratio of Pt-alkyl:Pt(η<sup>2</sup>-alkene) by <sup>31</sup>P NMR. The concentration of acid and base were calculated from the ratio of Pt-alkyl:Pt(η<sup>2</sup>-alkene). 100% cyclization would result in 10 equiv. of acid present in solution while 0% cyclization would result in 9 equiv. of acid and 1 equiv. of base.

---

<sup>5</sup> Commercial MeNO<sub>2</sub> contains traces of propionitrile that poison the Pt<sup>2+</sup> catalyst, for purification see: Parrett, F. W.; Sun, M. S. *J. Chem. Educ.* **1977**, *54*, 448-449.

$$K_{\text{eq}} = \frac{[\text{Pt-alkyl}][\text{Ph}_2\text{NH}_2^+]}{[\text{Pt}(\eta^2\text{-alkene})][\text{Ph}_2\text{NH}]}$$

**Structural Assignment for Products of Cyclization.** Stereochemical assignments for the products of the cyclization of *E:Z-1* and *E-7* were determined by the organic fragment of the X-ray structures of **4**, **8**, and **9** respectively. Reductive cleavage of the organic fragment with NaBH<sub>4</sub> followed by GC analysis resulted in a more expedient process to determine the products of cyclization with various Pt<sup>2+</sup> sources.<sup>6</sup> Products from the cyclization of **10** were isolated following the standard protocol for Pt-alkyl reductive cleavage with NaBH<sub>4</sub>.<sup>6</sup> The stereochemistry was determined by NOESY experiments on a 600 and 800 MHz spectrometer. *J*<sub>HH</sub> for the protons shown below was deduced from selective decoupling experiments performed on an 800 MHz spectrometer. Blue arrows indicate a weak NOE interaction.

---

<sup>6</sup> Koh, J. H.; Gagné, M. R. *Angew. Chem. Int. Ed.* **2004**, *43*, 3459-3461.

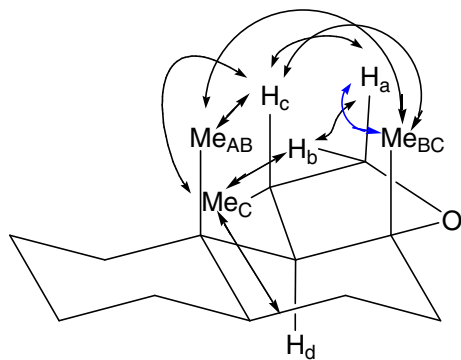**Major Diastereomer**

$\delta$  (ppm) (NOEs)

H<sub>a</sub>: 3.99 H<sub>b</sub>, H<sub>c</sub>, Me<sub>BC</sub>(w)  
 H<sub>b</sub>: 3.22 H<sub>a</sub>, Me<sub>C</sub>  
 H<sub>c</sub>: 2.25 H<sub>a</sub>, Me<sub>BC</sub>, Me<sub>C</sub>, Me<sub>AB</sub>  
 H<sub>d</sub>: 1.60 Me<sub>C</sub>

d,  $J_{HH} = 11.5$  Hz

Me<sub>AB</sub>: 0.74 H<sub>c</sub>, Me<sub>BC</sub>  
 Me<sub>BC</sub>: 1.08 H<sub>a</sub>(w), H<sub>c</sub>, Me<sub>AB</sub>  
 Me<sub>C</sub>: 1.02 H<sub>b</sub>, H<sub>c</sub>, H<sub>d</sub>  
 d,  $J_{HH} = 6.6$  Hz

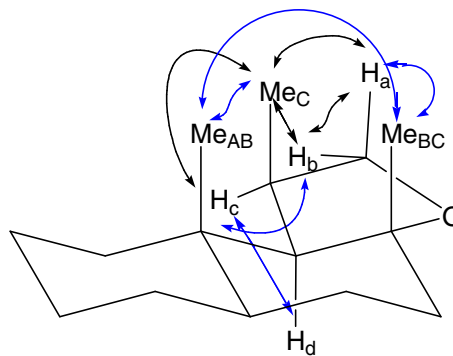**Minor Diastereomer**

$\delta$  (ppm) (NOEs)

3.43 H<sub>b</sub>, Me<sub>BC</sub>(w), Me<sub>C</sub>(w)  
 4.11 H<sub>a</sub>, H<sub>c</sub>(w), Me<sub>C</sub>(w)  
 2.43 H<sub>b</sub>(w), H<sub>D</sub>(w), Me<sub>C</sub>(w)  
 1.38 H<sub>C</sub>

d,  $J_{HH} = 9.0$  Hz

0.87 Me<sub>BC</sub>(w), Me<sub>C</sub>(w)  
 1.24 H<sub>a</sub>(w), Me<sub>AB</sub>(w)  
 1.11 H<sub>a</sub>, H<sub>b</sub>, H<sub>c</sub>, Me<sub>AB</sub>(w)  
 d,  $J_{HH} = 7.2$  Hz

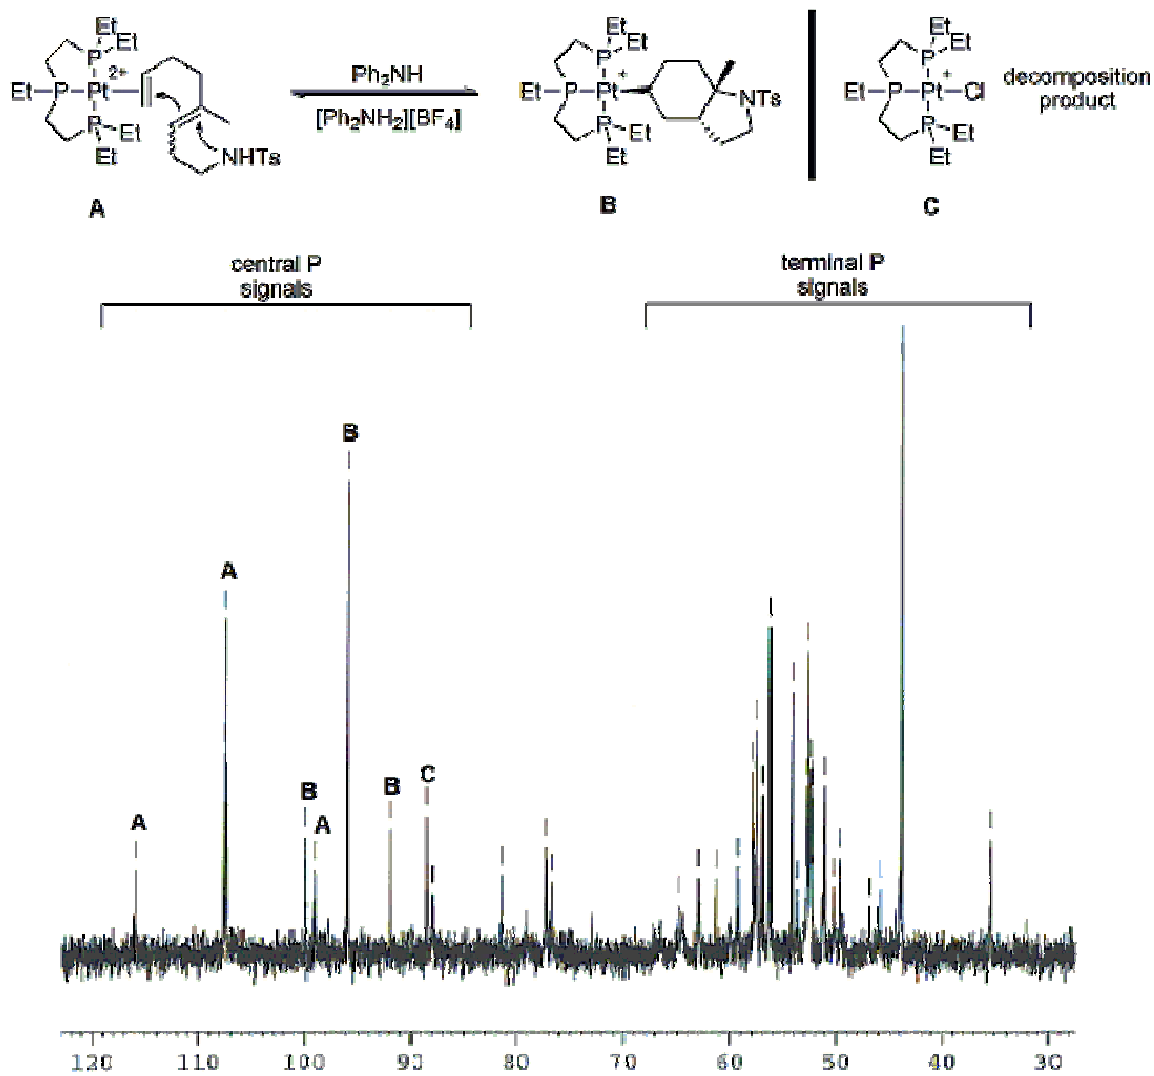

**Figure S1.**  $^{31}\text{P}$  NMR of cyclization of  $(E:Z)$ -1 with  $(\text{EtPPPEt})\text{Pt}^{2+}$  in  $\text{CH}_2\text{Cl}_2$ .



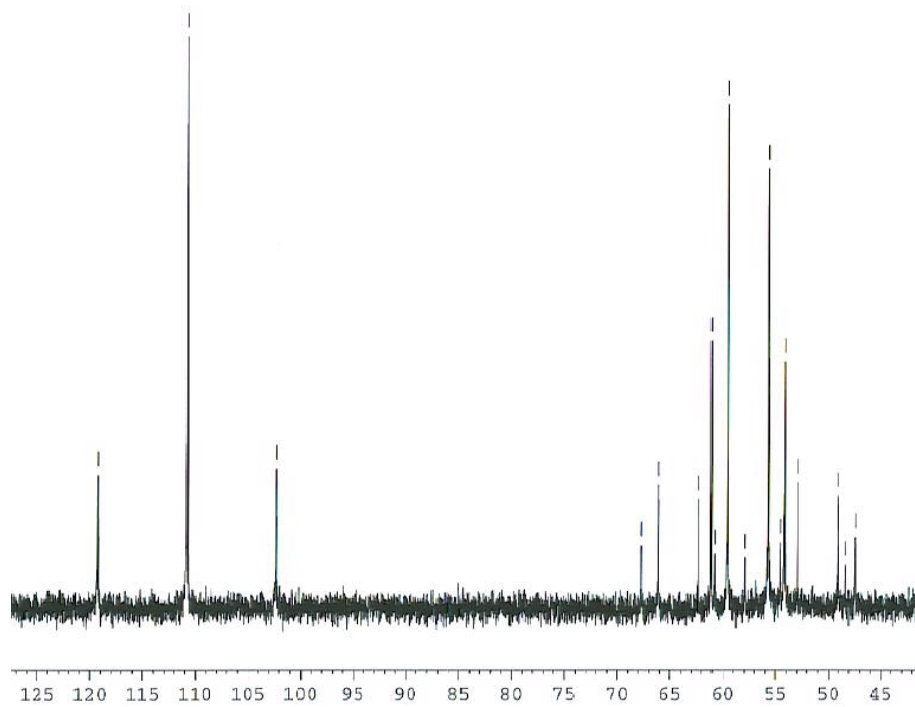

**Figure S2.**  $^{31}\text{P}$  NMR of  $[(\text{EtPPPEt})\text{Pt}(1\text{-hexene})][\text{BF}_4]_2$ .

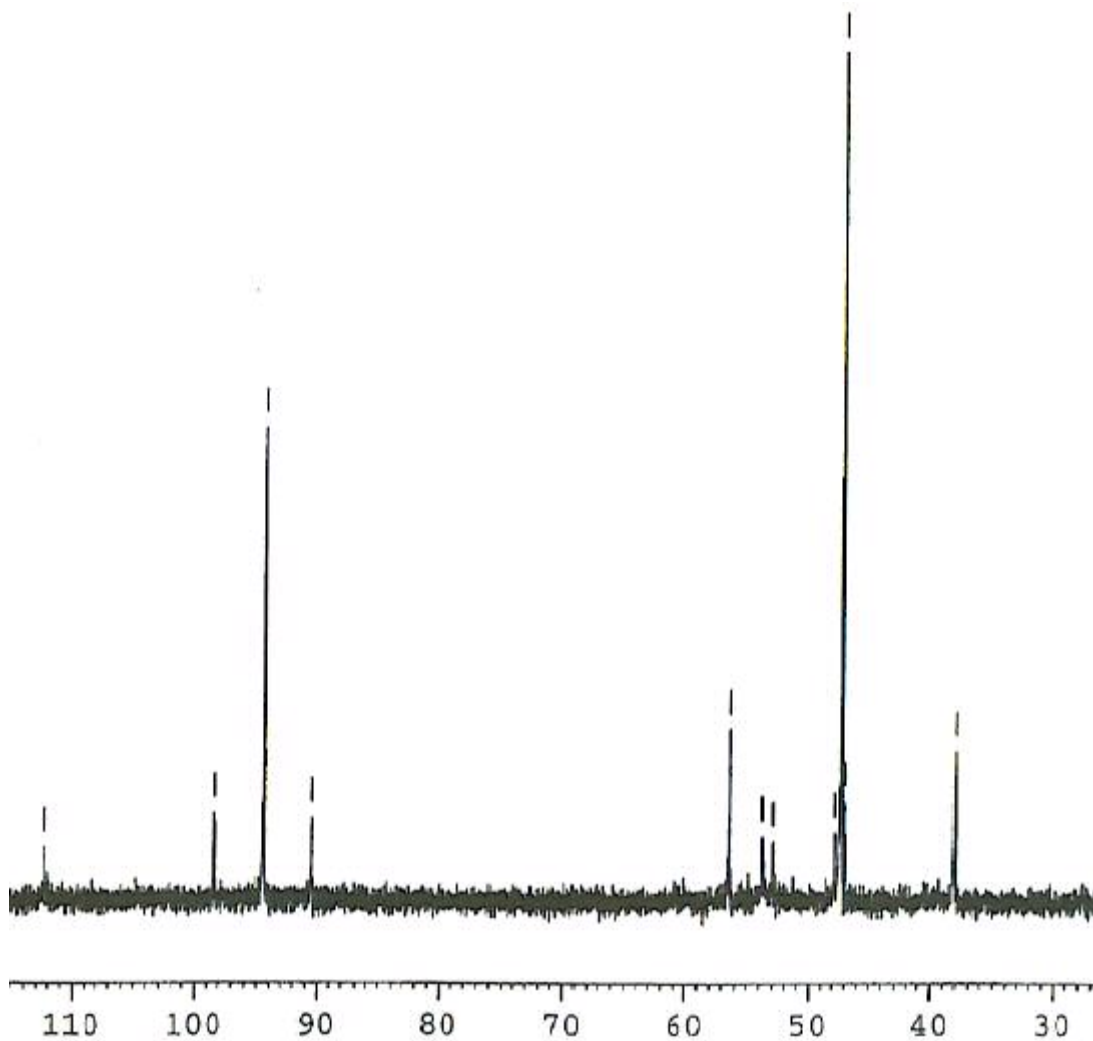

**Figure S3.**  $^{31}\text{P}$  NMR of cyclization of (*E:Z*)-**1** with  $(\text{EtPPP})\text{Pt}^{2+}$  in  $\text{MeNO}_2$ .

**Table S1.**  $^{31}\text{P}$  NMR chemical shifts<sup>7</sup> for  $\text{Pt}(\eta^2\text{-alkenyl})$  and  $\text{Pt}(\text{alkyl})$  complexes.

| Ligand   | $\text{Pt}(\eta^2\text{-alkenyl})$ | $\text{Pt}(\text{alkyl})$ |
|----------|------------------------------------|---------------------------|
| EtPPPEt  | 110.2 ppm                          | 98.3 ppm                  |
| tBuPPPEt | 136.4 ppm                          | 120.6 ppm                 |
| PPPEt    | 108.1 ppm                          | 95.3 ppm                  |
| EtPPP    | 110.7 ppm                          | 92.9 ppm                  |
| PPP      | -                                  | 91.4 ppm                  |

<sup>7</sup> Chemical shifts are given for the central P of the triphosphine ligand. This signal is the most diagnostic as the chemical shifts for the terminal phosphines in the  $\text{Pt}(\eta^2\text{-alkenyl})$  and the  $\text{Pt}(\text{alkyl})$  overlap.

**Table S2.** Acid or base additive effects on the cyclization of (*E:Z*)-**1**.<sup>a</sup>

| Entry | Additive                                     | A : B   |
|-------|----------------------------------------------|---------|
| 1     | None                                         | 14 : 1  |
| 1*    | Ph <sub>2</sub> NH                           | 1.6 : 1 |
| 4     | None                                         | 1 : 10  |
| 4*    | Ph <sub>2</sub> NH <sub>2</sub> <sup>+</sup> | 1 : 4   |

<sup>a</sup> Reaction conditions: [Pt] = 0.027 M, [Ph<sub>2</sub>NH<sub>2</sub>][BF<sub>4</sub>] = 0.27 M, [1] = 0.27 M, 25(1) °C. <sup>b</sup> Relative concentrations determined by <sup>31</sup>P NMR. Average of three measurements.

**Reductive Cleavage of Pt-alkyls.** To a 0.02 M solution of Pt-alkyl in dry Et<sub>2</sub>O (for *E-5* or *E-7*) or THF (for *E,E-10*) at 0°C was added 10 equivalents of NaBH<sub>4</sub> under N<sub>2</sub>. The reaction mixture was warmed to room temperature and stirred for 3-5 hours. At this point the reaction was quenched with H<sub>2</sub>O, diluted with brine and the cleaved products were extracted with Et<sub>2</sub>O and washed three times with brine. The organic layer was separated, dried over MgSO<sub>4</sub>, filtered and concentrated. For *E-5*, the product was concentrated on a rotary evaporator at 0 °C. The crude material was purified by chromatography on silica with 300:1 pentane/Et<sub>2</sub>O to yield 13.0 mg (26%) of clear oil whose purity was compared to known spectral data. For *E-7*, the products were concentrated on a rotary evaporator at 0 °C and injected onto the GC (HP 6890 with a DB-1 column; 80 °C for 8 min, 20 °C/min to 250 °C, hold 15 min): t<sub>R</sub> 8.87 min (kinetic-PPP) and 9.34 min (thermodynamic-EtPPP). For *E,E-10*, the products were concentrated under vacuum and the 2:1 mixture of diastereomers was obtained by chromatography on silica gel using 300:1 hexanes/EtOAc.

### X-Ray Structure Determinations of **4**, **8** and **9**.

**General Procedure.** Crystals of **4** suitable for X-ray crystallography were grown from slow evaporation of a dichloromethane solution. Crystals of **8** and **9** suitable for X-

ray crystallography were grown from vapor diffusion using dichloromethane and pentane at room temperature (48 h for **9**, 7 days for **8**). Single crystals were mounted in oil on the end of a fiber. Intensity data were collected on a Siemens SMART diffractometer with CCD detection using Mo K $\alpha$  radiation of wavelength 0.71073 Å (to scan mode). The structure was solved by direct methods and refined by least-squares techniques on  $F$  using structure solution programs from the NARCVAX system.<sup>8</sup> All non-hydrogen atoms were refined anisotropically. Hydrogen atoms were placed in calculated positions (C-H = 0.96 Å) and allowed to ride on the atoms to which they were bonded. Crystal data, data collection, and refinement parameters for **4**, **8** and **9** are listed in Table S3, S8 and S14 respectively. Absorption corrections were made using SADABS. The X-ray structure for compound **4** was refined as an enantiomeric twin which resulted in the expected 50:50 mix. For compound **8**, the structure was solved in P2(1)/c (with  $Z = 8$ ,  $Z' = 2$ ). One molecule was disordered but eventually refined with the disordered portion restrained to have a consistent geometry. This still led to an unstable refinement and weak restraints on thermal parameters were put in place. In the structure shown for **9**, PLATON/Squeeze was used to model the solvent as it was too disordered to model with atomic positions (results are found at the bottom of the .cif file).

---

<sup>8</sup> Gabe, E. J.; Le Page, Y.; Charland, J. P.; Lee, F. L.; White, P. S. *J. Appl. Crystallogr.* **1989**, 22, 384-392.

**Table S3.** Crystallographic data and collection parameters for **4**.

|                                           | <b>4</b>                                                                                           |
|-------------------------------------------|----------------------------------------------------------------------------------------------------|
| Empirical Formula                         | C <sub>51</sub> H <sub>57</sub> BCl <sub>2</sub> F <sub>4</sub> NO <sub>2</sub> P <sub>3</sub> PtS |
| FW                                        | 1193.75                                                                                            |
| Space Group                               | Orthorhombic, P2 <sub>1</sub> 2 <sub>1</sub> 2                                                     |
| <i>A</i>                                  | 18.7099(12)                                                                                        |
| <i>B</i>                                  | 25.8448(13)                                                                                        |
| <i>C</i>                                  | 10.7596(4)                                                                                         |
| <i>V</i> , Å <sup>3</sup>                 | 5202.8(5)                                                                                          |
| <i>Z</i>                                  | 4                                                                                                  |
| <i>T</i> , K                              | 173(2)                                                                                             |
| <i>D</i> <sub>c</sub> , Mg/m <sup>3</sup> | 1.524                                                                                              |
| <i>λ</i> , Å                              | Mo Kα (0.71073)                                                                                    |
| <i>μ</i> , mm <sup>-1</sup>               | 2.986                                                                                              |
| <i>R</i> <sub>f</sub> <sup><i>a</i></sup> | 0.0706                                                                                             |
| <i>R</i> <sub>w</sub> <sup><i>b</i></sup> | 0.1536                                                                                             |
| GOF <sup><i>c</i></sup>                   | 1.093                                                                                              |

<sup>*a*</sup> $R_f = \Sigma(F_o - F_c)/\Sigma F_o$ . <sup>*b*</sup> $R_w = [\Sigma\omega(F_o - F_c)^2/\Sigma\omega F_o^2]^{1/2}$ . <sup>*c*</sup>GOF =  $[\Sigma\omega(F_o - F_c)^2/(n - p)]^{1/2}$ , where *n* = number of reflections and *p* = number of parameters.

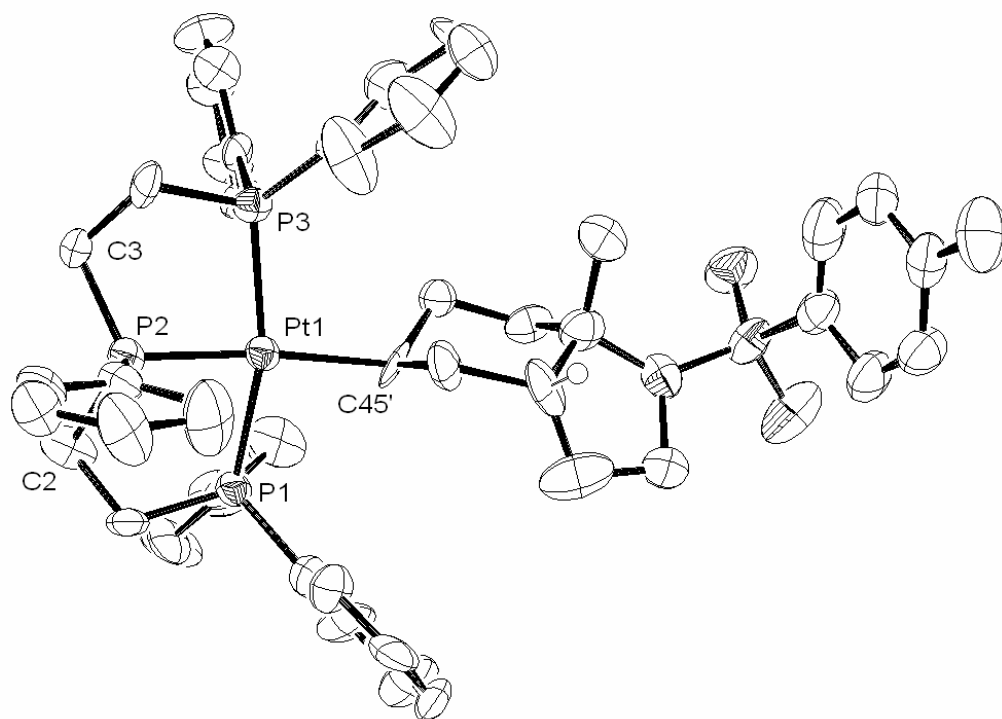

**Figure S3.** ORTEP drawing of **4**.  $\text{BF}_4^-$  counter ion and solvent molecule not shown.

**Table S4.** Atomic coordinates ( $\times 10^4$ ) and equivalent isotropic displacement parameters ( $\text{\AA}^2 \times 10^3$ ) for **4**.  $U(\text{eq})$  is defined as one third of the trace of the orthogonalized  $U^{ij}$  tensor.

|         | x         | y         | z          | $U(\text{eq})$ |
|---------|-----------|-----------|------------|----------------|
| Pt (1)  | 2931 (1)  | 8829 (1)  | -457 (1)   | 31 (1)         |
| P (1)   | 2969 (3)  | 9696 (1)  | -781 (3)   | 35 (1)         |
| P (2)   | 4067 (2)  | 8843 (2)  | -1136 (3)  | 33 (1)         |
| P (3)   | 3016 (2)  | 7946 (1)  | -753 (3)   | 33 (1)         |
| S (1)   | -461 (2)  | 8601 (2)  | 3652 (4)   | 50 (1)         |
| C (1)   | 3896 (9)  | 9867 (5)  | -1201 (13) | 42 (4)         |
| C (2)   | 4207 (10) | 9456 (6)  | -1973 (13) | 50 (5)         |
| C (3)   | 4265 (8)  | 8247 (6)  | -1980 (13) | 36 (4)         |
| C (4)   | 3953 (7)  | 7824 (6)  | -1208 (14) | 41 (4)         |
| C (5)   | 2720 (8)  | 10133 (6) | 513 (17)   | 49 (4)         |
| C (6)   | 3087 (11) | 10050 (7) | 1627 (12)  | 58 (5)         |
| C (7)   | 2902 (16) | 10347 (7) | 2650 (18)  | 83 (7)         |
| C (8)   | 2346 (11) | 10704 (9) | 2560 (20)  | 81 (8)         |
| C (9)   | 2006 (12) | 10755 (8) | 1470 (19)  | 79 (6)         |
| C (10)  | 2200 (9)  | 10483 (6) | 414 (19)   | 64 (5)         |
| C (11)  | 2390 (9)  | 9883 (6)  | -2055 (14) | 42 (4)         |
| C (12)  | 2567 (11) | 10280 (7) | -2905 (16) | 64 (6)         |
| C (13)  | 2088 (13) | 10429 (7) | -3802 (16) | 74 (6)         |
| C (14)  | 1448 (12) | 10164 (7) | -3980 (18) | 75 (6)         |
| C (15)  | 1252 (12) | 9767 (8)  | -3151 (18) | 73 (6)         |
| C (16)  | 1728 (11) | 9629 (7)  | -2236 (15) | 65 (6)         |
| C (17)  | 4705 (7)  | 8838 (6)  | 102 (12)   | 42 (3)         |
| C (18)  | 5426 (8)  | 8849 (7)  | -51 (12)   | 47 (4)         |
| C (19)  | 5914 (9)  | 8837 (8)  | 931 (13)   | 57 (4)         |
| C (20)  | 5644 (10) | 8858 (9)  | 2160 (13)  | 71 (6)         |
| C (21)  | 4926 (10) | 8827 (10) | 2353 (14)  | 81 (6)         |
| C (22)  | 4451 (8)  | 8875 (7)  | 1381 (11)  | 49 (4)         |
| C (24)  | 2097 (9)  | 8086 (5)  | -2777 (12) | 42 (3)         |
| C (25)  | 1747 (9)  | 7943 (6)  | -3798 (15) | 50 (4)         |
| C (26)  | 1794 (9)  | 7451 (7)  | -4230 (13) | 54 (5)         |
| C (27)  | 2220 (10) | 7093 (7)  | -3646 (16) | 61 (5)         |
| C (28)  | 2583 (9)  | 7246 (7)  | -2574 (14) | 47 (4)         |
| C (29)  | 2519 (8)  | 7733 (6)  | -2117 (11) | 31 (3)         |
| C (30)  | 2821 (8)  | 7506 (5)  | 492 (15)   | 40 (3)         |
| C (31)  | 2244 (10) | 7164 (7)  | 479 (19)   | 65 (5)         |
| C (32)  | 2103 (14) | 6837 (6)  | 1519 (15)  | 73 (6)         |
| C (33)  | 2531 (11) | 6850 (7)  | 2517 (16)  | 60 (5)         |
| C (34)  | 3073 (13) | 7179 (9)  | 2576 (16)  | 89 (8)         |
| C (35)  | 3250 (10) | 7486 (9)  | 1571 (16)  | 79 (7)         |
| C (37)  | 1124 (8)  | 9020 (20) | 240 (70)   | 37 (4)         |
| C (38)  | 661 (7)   | 8651 (6)  | 1020 (12)  | 44 (4)         |
| C (45)  | 1913 (6)  | 8879 (5)  | 461 (11)   | 49 (4)         |
| C (37') | 1303 (7)  | 8521 (6)  | 180 (14)   | 37 (4)         |
| C (38') | 661 (7)   | 8651 (6)  | 1020 (12)  | 44 (4)         |
| C (45') | 1913 (6)  | 8879 (5)  | 461 (11)   | 49 (4)         |
| C (39)  | 859 (9)   | 8561 (7)  | 2391 (14)  | 49 (4)         |

|       |          |          |          |         |
|-------|----------|----------|----------|---------|
| N(40) | 282(6)   | 8820(6)  | 3125(11) | 49(3)   |
| C(41) | 558(12)  | 9310(8)  | 3780(20) | 86(7)   |
| C(42) | 1247(13) | 9369(8)  | 3160(20) | 88(7)   |
| C(43) | 1517(8)  | 8840(8)  | 2826(12) | 58(5)   |
| C(44) | 2159(8)  | 8747(6)  | 1885(11) | 49(4)   |
| O(46) | -722(7)  | 8236(5)  | 2796(11) | 68(4)   |
| O(47) | -903(7)  | 9052(6)  | 3967(11) | 80(4)   |
| C(48) | -303(9)  | 8292(7)  | 5058(15) | 52(4)   |
| C(49) | -216(11) | 7788(9)  | 5113(17) | 77(6)   |
| C(50) | -54(12)  | 7523(8)  | 6192(18) | 78(6)   |
| C(51) | 47(9)    | 7795(8)  | 7273(14) | 55(4)   |
| C(52) | -64(10)  | 8333(7)  | 7235(16) | 58(5)   |
| C(53) | -246(10) | 8589(8)  | 6160(14) | 61(5)   |
| C(54) | 311(12)  | 7549(10) | 8450(17) | 91(7)   |
| C(55) | 912(9)   | 7976(6)  | 2697(15) | 50(4)   |
| B(61) | 5807(10) | 8877(10) | 5878(15) | 55(5)   |
| F(62) | 5229(12) | 9027(13) | 5378(15) | 274(17) |
| F(63) | 5618(15) | 8352(12) | 6010(30) | 320(20) |
| F(64) | 5895(6)  | 9005(5)  | 7070(8)  | 81(4)   |
| F(65) | 6416(5)  | 8860(5)  | 5203(8)  | 74(3)   |
| C(71) | 3568(15) | 8934(6)  | 4550(30) | 170(40) |
| Cl(1) | 3407(7)  | 8268(5)  | 4416(13) | 92(3)   |
| Cl(2) | 2892(8)  | 9217(6)  | 5431(13) | 124(5)  |

**Table S5.** Bond lengths [ $\text{\AA}$ ] and angles [ $^\circ$ ] for **4**.

|               |           |
|---------------|-----------|
| Pt(1) - C(45) | 2.150(11) |
| Pt(1) - P(2)  | 2.247(3)  |
| Pt(1) - P(1)  | 2.269(4)  |
| Pt(1) - P(3)  | 2.308(4)  |
| P(1) - C(11)  | 1.814(15) |
| P(1) - C(1)   | 1.845(16) |
| P(1) - C(5)   | 1.854(17) |
| P(2) - C(17)  | 1.789(13) |
| P(2) - C(3)   | 1.826(14) |
| P(2) - C(2)   | 1.842(15) |
| P(3) - C(30)  | 1.795(15) |
| P(3) - C(29)  | 1.824(13) |
| P(3) - C(4)   | 1.847(14) |
| S(1) - O(46)  | 1.406(12) |
| S(1) - O(47)  | 1.469(13) |
| S(1) - N(40)  | 1.605(13) |
| S(1) - C(48)  | 1.736(17) |
| C(1) - C(2)   | 1.47(2)   |
| C(3) - C(4)   | 1.49(2)   |
| C(5) - C(10)  | 1.33(2)   |
| C(5) - C(6)   | 1.40(2)   |
| C(6) - C(7)   | 1.38(2)   |
| C(7) - C(8)   | 1.40(3)   |
| C(8) - C(9)   | 1.34(3)   |
| C(9) - C(10)  | 1.38(2)   |
| C(11) - C(12) | 1.41(2)   |
| C(11) - C(16) | 1.42(2)   |
| C(12) - C(13) | 1.37(3)   |
| C(13) - C(14) | 1.39(3)   |



|                      |             |
|----------------------|-------------|
| C(14) - C(15)        | 1.41 (3)    |
| C(15) - C(16)        | 1.37 (2)    |
| C(17) - C(18)        | 1.361 (19)  |
| C(17) - C(22)        | 1.458 (19)  |
| C(18) - C(19)        | 1.397 (19)  |
| C(19) - C(20)        | 1.42 (2)    |
| C(20) - C(21)        | 1.36 (2)    |
| C(21) - C(22)        | 1.38 (2)    |
| C(24) - C(25)        | 1.33 (2)    |
| C(24) - C(29)        | 1.400 (19)  |
| C(25) - C(26)        | 1.35 (2)    |
| C(26) - C(27)        | 1.37 (2)    |
| C(27) - C(28)        | 1.40 (2)    |
| C(28) - C(29)        | 1.36 (2)    |
| C(30) - C(31)        | 1.40 (2)    |
| C(30) - C(35)        | 1.41 (2)    |
| C(31) - C(32)        | 1.43 (2)    |
| C(32) - C(33)        | 1.34 (3)    |
| C(33) - C(34)        | 1.33 (3)    |
| C(34) - C(35)        | 1.38 (2)    |
| C(37) - C(45)        | 1.544 (10)  |
| C(37) - C(38)        | 1.547 (10)  |
| C(38) - C(39)        | 1.54 (2)    |
| C(45) - C(44)        | 1.636 (18)  |
| C(39) - C(43)        | 1.50 (2)    |
| C(39) - N(40)        | 1.50 (2)    |
| C(39) - C(55)        | 1.55 (2)    |
| N(40) - C(41)        | 1.54 (2)    |
| C(41) - C(42)        | 1.46 (3)    |
| C(42) - C(43)        | 1.50 (3)    |
| C(43) - C(44)        | 1.59 (2)    |
| C(48) - C(49)        | 1.31 (3)    |
| C(48) - C(53)        | 1.42 (2)    |
| C(49) - C(50)        | 1.38 (3)    |
| C(50) - C(51)        | 1.37 (2)    |
| C(51) - C(52)        | 1.40 (2)    |
| C(51) - C(54)        | 1.50 (2)    |
| C(52) - C(53)        | 1.38 (2)    |
| B(61) - F(62)        | 1.27 (2)    |
| B(61) - F(64)        | 1.335 (19)  |
| B(61) - F(65)        | 1.35 (2)    |
| B(61) - F(63)        | 1.41 (4)    |
| C(71) - Cl(2)        | 1.742 (10)  |
| C(71) - Cl(1)        | 1.753 (10)  |
| <br>                 |             |
| C(45) - Pt(1) - P(2) | 170.5 (4)   |
| C(45) - Pt(1) - P(1) | 92.2 (4)    |
| P(2) - Pt(1) - P(1)  | 84.51 (16)  |
| C(45) - Pt(1) - P(3) | 100.6 (4)   |
| P(2) - Pt(1) - P(3)  | 84.63 (16)  |
| P(1) - Pt(1) - P(3)  | 162.28 (10) |
| C(11) - P(1) - C(1)  | 108.2 (8)   |
| C(11) - P(1) - C(5)  | 104.7 (7)   |
| C(1) - P(1) - C(5)   | 105.9 (6)   |
| C(11) - P(1) - Pt(1) | 111.2 (5)   |
| C(1) - P(1) - Pt(1)  | 107.7 (5)   |
| C(5) - P(1) - Pt(1)  | 118.6 (5)   |

|                       |            |
|-----------------------|------------|
| C(17) - P(2) - C(3)   | 103.3 (7)  |
| C(17) - P(2) - C(2)   | 105.9 (7)  |
| C(3) - P(2) - C(2)    | 117.0 (6)  |
| C(17) - P(2) - Pt(1)  | 112.9 (4)  |
| C(3) - P(2) - Pt(1)   | 109.9 (5)  |
| C(2) - P(2) - Pt(1)   | 107.9 (6)  |
| C(30) - P(3) - C(29)  | 107.8 (7)  |
| C(30) - P(3) - C(4)   | 106.4 (7)  |
| C(29) - P(3) - C(4)   | 102.6 (7)  |
| C(30) - P(3) - Pt(1)  | 120.7 (5)  |
| C(29) - P(3) - Pt(1)  | 112.0 (5)  |
| C(4) - P(3) - Pt(1)   | 105.7 (5)  |
| O(46) - S(1) - O(47)  | 119.3 (8)  |
| O(46) - S(1) - N(40)  | 107.8 (8)  |
| O(47) - S(1) - N(40)  | 106.8 (9)  |
| O(46) - S(1) - C(48)  | 108.7 (9)  |
| O(47) - S(1) - C(48)  | 105.1 (8)  |
| N(40) - S(1) - C(48)  | 108.9 (8)  |
| C(2) - C(1) - P(1)    | 109.7 (11) |
| C(1) - C(2) - P(2)    | 106.8 (11) |
| C(4) - C(3) - P(2)    | 105.1 (10) |
| C(3) - C(4) - P(3)    | 113.2 (11) |
| C(10) - C(5) - C(6)   | 122.1 (17) |
| C(10) - C(5) - P(1)   | 122.6 (14) |
| C(6) - C(5) - P(1)    | 115.2 (13) |
| C(7) - C(6) - C(5)    | 118 (2)    |
| C(6) - C(7) - C(8)    | 120 (2)    |
| C(9) - C(8) - C(7)    | 118.4 (18) |
| C(8) - C(9) - C(10)   | 123 (2)    |
| C(5) - C(10) - C(9)   | 118.1 (19) |
| C(12) - C(11) - C(16) | 116.9 (15) |
| C(12) - C(11) - P(1)  | 122.9 (14) |
| C(16) - C(11) - P(1)  | 120.2 (13) |
| C(13) - C(12) - C(11) | 120.5 (18) |
| C(12) - C(13) - C(14) | 121.3 (16) |
| C(13) - C(14) - C(15) | 119.7 (17) |
| C(16) - C(15) - C(14) | 118 (2)    |
| C(15) - C(16) - C(11) | 123.0 (17) |
| C(18) - C(17) - C(22) | 115.8 (12) |
| C(18) - C(17) - P(2)  | 124.9 (11) |
| C(22) - C(17) - P(2)  | 119.1 (10) |
| C(17) - C(18) - C(19) | 123.9 (13) |
| C(18) - C(19) - C(20) | 118.1 (15) |
| C(21) - C(20) - C(19) | 119.5 (15) |
| C(20) - C(21) - C(22) | 121.0 (15) |
| C(21) - C(22) - C(17) | 120.1 (14) |
| C(25) - C(24) - C(29) | 121.0 (14) |
| C(24) - C(25) - C(26) | 120.7 (15) |
| C(25) - C(26) - C(27) | 120.9 (15) |
| C(26) - C(27) - C(28) | 117.9 (16) |
| C(29) - C(28) - C(27) | 121.3 (15) |
| C(28) - C(29) - C(24) | 118.1 (13) |
| C(28) - C(29) - P(3)  | 121.8 (11) |
| C(24) - C(29) - P(3)  | 119.9 (11) |
| C(31) - C(30) - C(35) | 115.1 (16) |
| C(31) - C(30) - P(3)  | 123.5 (14) |
| C(35) - C(30) - P(3)  | 121.4 (12) |

|                     |            |
|---------------------|------------|
| C(30) -C(31) -C(32) | 120.7 (18) |
| C(33) -C(32) -C(31) | 120.2 (18) |
| C(34) -C(33) -C(32) | 120.8 (16) |
| C(33) -C(34) -C(35) | 120.9 (17) |
| C(34) -C(35) -C(30) | 122.0 (17) |
| C(45) -C(37) -C(38) | 107.3 (13) |
| C(39) -C(38) -C(37) | 119 (3)    |
| C(37) -C(45) -C(44) | 118 (3)    |
| C(37) -C(45) -Pt(1) | 142 (2)    |
| C(44) -C(45) -Pt(1) | 99.7 (8)   |
| C(43) -C(39) -N(40) | 102.2 (13) |
| C(43) -C(39) -C(38) | 115.1 (13) |
| N(40) -C(39) -C(38) | 105.3 (12) |
| C(43) -C(39) -C(55) | 110.5 (14) |
| N(40) -C(39) -C(55) | 111.7 (13) |
| C(38) -C(39) -C(55) | 111.5 (13) |
| C(39) -N(40) -C(41) | 111.6 (13) |
| C(39) -N(40) -S(1)  | 130.8 (13) |
| C(41) -N(40) -S(1)  | 114.8 (11) |
| C(42) -C(41) -N(40) | 99.9 (15)  |
| C(41) -C(42) -C(43) | 108.1 (18) |
| C(39) -C(43) -C(42) | 103.7 (15) |
| C(39) -C(43) -C(44) | 110.4 (13) |
| C(42) -C(43) -C(44) | 122.9 (16) |
| C(43) -C(44) -C(45) | 110.7 (11) |
| C(49) -C(48) -C(53) | 119.3 (16) |
| C(49) -C(48) -S(1)  | 121.1 (14) |
| C(53) -C(48) -S(1)  | 119.5 (14) |
| C(48) -C(49) -C(50) | 123.8 (18) |
| C(51) -C(50) -C(49) | 119.2 (19) |
| C(50) -C(51) -C(52) | 117.5 (17) |
| C(50) -C(51) -C(54) | 123 (2)    |
| C(52) -C(51) -C(54) | 119.5 (17) |
| C(53) -C(52) -C(51) | 122.5 (17) |
| C(52) -C(53) -C(48) | 117.5 (17) |
| F(62) -B(61) -F(64) | 115.9 (18) |
| F(62) -B(61) -F(65) | 120.1 (18) |
| F(64) -B(61) -F(65) | 114.9 (16) |
| F(62) -B(61) -F(63) | 97 (3)     |
| F(64) -B(61) -F(63) | 100 (2)    |
| F(65) -B(61) -F(63) | 103.6 (18) |
| Cl(2) -C(71) -Cl(1) | 109.4 (12) |

**Table S6.** Anisotropic displacement parameters ( $\text{\AA}^2 \times 10^3$ ) for **4**. The anisotropic displacement factor exponent takes the form:  $-2\pi^2[h^2a^*2U^{11} + \dots + 2hk a^* b^* U^{12}]$ .

|       | $U_{11}$ | $U_{22}$ | $U_{33}$ | $U_{23}$ | $U_{13}$ | $U_{12}$ |
|-------|----------|----------|----------|----------|----------|----------|
| Pt(1) | 40 (1)   | 31 (1)   | 22 (1)   | 3 (1)    | 1 (1)    | -4 (1)   |

|         |          |          |          |          |          |          |
|---------|----------|----------|----------|----------|----------|----------|
| P (1)   | 45 (2)   | 31 (2)   | 28 (2)   | 2 (1)    | 4 (2)    | -6 (2)   |
| P (2)   | 42 (2)   | 36 (2)   | 22 (2)   | 4 (2)    | 0 (1)    | -3 (2)   |
| P (3)   | 40 (2)   | 32 (2)   | 26 (2)   | -2 (1)   | -5 (2)   | -1 (2)   |
| S (1)   | 53 (3)   | 61 (3)   | 38 (2)   | -13 (2)  | -2 (2)   | 8 (2)    |
| C (1)   | 71 (12)  | 22 (8)   | 35 (8)   | -6 (6)   | 10 (8)   | -9 (7)   |
| C (2)   | 83 (13)  | 49 (11)  | 19 (7)   | 11 (7)   | -24 (8)  | -19 (9)  |
| C (3)   | 37 (9)   | 38 (9)   | 34 (8)   | -3 (7)   | 12 (6)   | 2 (7)    |
| C (4)   | 22 (8)   | 57 (11)  | 43 (9)   | -13 (8)  | 8 (7)    | 5 (7)    |
| C (5)   | 55 (11)  | 51 (9)   | 43 (8)   | -6 (9)   | 7 (9)    | -12 (7)  |
| C (6)   | 89 (15)  | 62 (11)  | 22 (7)   | -3 (7)   | 12 (8)   | -9 (10)  |
| C (7)   | 140 (20) | 39 (10)  | 66 (12)  | -3 (8)   | 40 (15)  | -45 (15) |
| C (8)   | 66 (13)  | 75 (15)  | 102 (17) | -57 (13) | 55 (13)  | -27 (11) |
| C (9)   | 54 (12)  | 99 (16)  | 84 (13)  | -53 (12) | -16 (12) | -1 (12)  |
| C (10)  | 56 (11)  | 60 (11)  | 77 (11)  | -40 (10) | -21 (12) | -2 (9)   |
| C (11)  | 49 (10)  | 42 (10)  | 34 (8)   | -15 (7)  | -12 (7)  | 10 (8)   |
| C (12)  | 97 (15)  | 53 (12)  | 42 (10)  | 20 (9)   | 19 (10)  | -19 (10) |
| C (13)  | 107 (16) | 56 (11)  | 60 (11)  | 38 (9)   | -36 (13) | -22 (13) |
| C (14)  | 95 (16)  | 56 (13)  | 75 (13)  | 13 (10)  | -37 (12) | 22 (12)  |
| C (15)  | 91 (16)  | 59 (13)  | 70 (13)  | -6 (10)  | -13 (12) | 9 (11)   |
| C (16)  | 94 (15)  | 65 (13)  | 35 (9)   | 30 (9)   | -29 (9)  | -2 (11)  |
| C (17)  | 39 (8)   | 33 (7)   | 54 (8)   | 4 (8)    | -3 (6)   | -7 (8)   |
| C (18)  | 57 (9)   | 45 (9)   | 38 (7)   | 12 (7)   | -7 (6)   | -10 (9)  |
| C (19)  | 55 (10)  | 66 (11)  | 51 (8)   | 4 (9)    | -1 (7)   | -11 (11) |
| C (20)  | 76 (12)  | 113 (16) | 25 (7)   | 16 (11)  | -12 (7)  | -34 (14) |
| C (21)  | 75 (13)  | 136 (19) | 33 (8)   | -9 (13)  | 3 (8)    | -23 (16) |
| C (22)  | 58 (9)   | 67 (11)  | 22 (6)   | -5 (8)   | 2 (6)    | -20 (10) |
| C (24)  | 52 (9)   | 38 (8)   | 35 (7)   | 6 (6)    | -1 (8)   | 22 (9)   |
| C (25)  | 60 (10)  | 44 (10)  | 47 (9)   | 4 (8)    | -19 (8)  | -4 (8)   |
| C (26)  | 69 (12)  | 58 (11)  | 36 (9)   | 3 (7)    | -15 (7)  | 6 (9)    |
| C (27)  | 72 (14)  | 48 (11)  | 62 (10)  | -19 (8)  | -29 (10) | 15 (9)   |
| C (28)  | 50 (10)  | 53 (11)  | 39 (8)   | 4 (8)    | -13 (7)  | -3 (8)   |
| C (29)  | 39 (8)   | 40 (9)   | 15 (6)   | -3 (6)   | 4 (6)    | -1 (7)   |
| C (30)  | 55 (9)   | 25 (7)   | 40 (7)   | -4 (7)   | 12 (9)   | 2 (7)    |
| C (31)  | 86 (14)  | 61 (11)  | 47 (9)   | -6 (9)   | -2 (11)  | -4 (10)  |
| C (32)  | 126 (17) | 40 (10)  | 54 (10)  | 17 (8)   | 2 (13)   | -43 (13) |
| C (33)  | 75 (13)  | 63 (13)  | 41 (10)  | 31 (9)   | -2 (9)   | -4 (11)  |
| C (34)  | 110 (20) | 111 (18) | 43 (10)  | 33 (11)  | -35 (11) | -48 (16) |
| C (35)  | 66 (13)  | 130 (20) | 45 (11)  | 40 (12)  | -24 (9)  | -34 (12) |
| C (38)  | 54 (10)  | 42 (10)  | 37 (7)   | -8 (6)   | -15 (7)  | 5 (7)    |
| C (45)  | 82 (11)  | 47 (9)   | 17 (5)   | 6 (7)    | 30 (7)   | 35 (9)   |
| C (38') | 54 (10)  | 42 (10)  | 37 (7)   | -8 (6)   | -15 (7)  | 5 (7)    |
| C (45') | 82 (11)  | 47 (9)   | 17 (5)   | 6 (7)    | 30 (7)   | 35 (9)   |
| C (39)  | 61 (11)  | 49 (10)  | 39 (8)   | -6 (8)   | -4 (7)   | -1 (8)   |
| N (40)  | 45 (7)   | 50 (8)   | 52 (7)   | 7 (8)    | 4 (6)    | -5 (8)   |
| C (41)  | 96 (17)  | 59 (14)  | 104 (16) | -31 (12) | 46 (14)  | -33 (12) |
| C (42)  | 114 (19) | 75 (15)  | 76 (14)  | -41 (12) | -43 (14) | 1 (14)   |
| C (43)  | 68 (10)  | 86 (13)  | 19 (6)   | 18 (9)   | -4 (6)   | -38 (12) |
| C (44)  | 56 (10)  | 65 (11)  | 27 (6)   | 3 (7)    | 10 (7)   | -20 (10) |
| O (46)  | 69 (8)   | 71 (9)   | 64 (8)   | -27 (7)  | -6 (6)   | -9 (7)   |
| O (47)  | 83 (9)   | 107 (11) | 49 (7)   | -21 (7)  | -25 (6)  | 48 (8)   |
| C (48)  | 47 (10)  | 52 (11)  | 55 (10)  | -6 (8)   | 9 (7)    | 11 (8)   |
| C (49)  | 77 (14)  | 107 (19) | 46 (11)  | -12 (11) | 14 (9)   | -12 (13) |
| C (50)  | 94 (16)  | 72 (14)  | 68 (13)  | -16 (11) | 39 (12)  | -24 (12) |
| C (51)  | 47 (10)  | 77 (13)  | 41 (9)   | -6 (9)   | 8 (7)    | -7 (9)   |
| C (52)  | 77 (13)  | 52 (12)  | 44 (10)  | -1 (8)   | 3 (9)    | 13 (10)  |
| C (53)  | 67 (12)  | 74 (13)  | 43 (9)   | -18 (9)  | 6 (9)    | -6 (10)  |
| C (54)  | 99 (17)  | 120 (20) | 49 (11)  | 18 (12)  | 8 (11)   | 3 (15)   |

|        |          |           |          |           |          |           |
|--------|----------|-----------|----------|-----------|----------|-----------|
| C (55) | 57 (11)  | 49 (10)   | 46 (9)   | 15 (8)    | -11 (8)  | 1 (8)     |
| B (61) | 54 (11)  | 76 (15)   | 37 (9)   | -9 (10)   | 0 (8)    | 6 (13)    |
| F (62) | 230 (20) | 530 (50)  | 60 (9)   | -8 (18)   | -52 (13) | 230 (30)  |
| F (63) | 270 (30) | 350 (30)  | 350 (40) | -280 (30) | 250 (30) | -250 (30) |
| F (64) | 93 (8)   | 120 (11)  | 29 (5)   | -27 (5)   | -5 (5)   | -1 (7)    |
| F (65) | 74 (6)   | 101 (8)   | 48 (5)   | -13 (6)   | 23 (5)   | -13 (7)   |
| C (71) | 60 (30)  | 430 (120) | 27 (16)  | 50 (50)   | 10 (20)  | -50 (40)  |
| Cl (1) | 96 (8)   | 85 (8)    | 95 (8)   | -2 (7)    | 4 (7)    | -1 (6)    |
| Cl (2) | 138 (11) | 136 (11)  | 98 (8)   | -29 (9)   | -45 (11) | 13 (10)   |

**Table S7.** Hydrogen coordinates ( $\times 10^4$ ) and isotropic displacement parameters ( $\text{\AA}^2 \times 10^3$ ) for **4**.

|         | x    | y     | z     | U (eq) |
|---------|------|-------|-------|--------|
| H (1A)  | 3899 | 10198 | -1665 | 51     |
| H (1B)  | 4184 | 9912  | -438  | 51     |
| H (2A)  | 4724 | 9519  | -2101 | 60     |
| H (2B)  | 3969 | 9445  | -2795 | 60     |
| H (3A)  | 4044 | 8253  | -2816 | 43     |
| H (3B)  | 4788 | 8200  | -2073 | 43     |
| H (4A)  | 4245 | 7782  | -448  | 49     |
| H (4B)  | 3976 | 7496  | -1680 | 49     |
| H (6)   | 3453 | 9797  | 1681  | 69     |
| H (7)   | 3154 | 10307 | 3410  | 99     |
| H (8)   | 2210 | 10907 | 3260  | 97     |
| H (9)   | 1615 | 10987 | 1419  | 95     |
| H (10)  | 1970 | 10545 | -358  | 77     |
| H (12)  | 3020 | 10444 | -2854 | 77     |
| H (13)  | 2196 | 10719 | -4313 | 89     |
| H (14)  | 1146 | 10251 | -4658 | 90     |
| H (15)  | 802  | 9599  | -3222 | 88     |
| H (16)  | 1607 | 9350  | -1700 | 78     |
| H (18)  | 5609 | 8866  | -873  | 56     |
| H (19)  | 6414 | 8815  | 780   | 69     |
| H (20)  | 5961 | 8894  | 2844  | 85     |
| H (21)  | 4750 | 8770  | 3169  | 97     |
| H (22)  | 3959 | 8933  | 1544  | 59     |
| H (24)  | 2060 | 8433  | -2492 | 50     |
| H (25)  | 1461 | 8188  | -4229 | 61     |
| H (26)  | 1529 | 7354  | -4945 | 65     |
| H (27)  | 2266 | 6751  | -3962 | 73     |
| H (28)  | 2880 | 7004  | -2156 | 57     |
| H (31)  | 1942 | 7149  | -229  | 78     |
| H (32)  | 1705 | 6609  | 1503  | 88     |
| H (33)  | 2444 | 6620  | 3190  | 71     |
| H (34)  | 3344 | 7205  | 3321  | 107    |
| H (35)  | 3672 | 7690  | 1607  | 95     |
| H (37A) | 1004 | 8991  | -656  | 45     |
| H (37B) | 1036 | 9387  | 494   | 45     |
| H (38A) | 163  | 8779  | 996   | 53     |

|        |      |      |      |     |
|--------|------|------|------|-----|
| H(38B) | 665  | 8310 | 599  | 53  |
| H(37C) | 1454 | 8159 | 322  | 45  |
| H(37D) | 1164 | 8557 | -704 | 45  |
| H(38C) | 520  | 9016 | 897  | 53  |
| H(38D) | 249  | 8429 | 793  | 53  |
| H(41A) | 242  | 9611 | 3630 | 104 |
| H(41B) | 615  | 9256 | 4685 | 104 |
| H(42A) | 1591 | 9544 | 3716 | 106 |
| H(42B) | 1192 | 9581 | 2398 | 106 |
| H(43)  | 1660 | 8673 | 3625 | 69  |
| H(44A) | 2317 | 8382 | 1936 | 59  |
| H(44B) | 2568 | 8970 | 2119 | 59  |
| H(49)  | -268 | 7594 | 4368 | 92  |
| H(50)  | -14  | 7157 | 6187 | 93  |
| H(52)  | -10  | 8527 | 7979 | 69  |
| H(53)  | -331 | 8951 | 6157 | 73  |
| H(54A) | 834  | 7566 | 8475 | 136 |
| H(54B) | 158  | 7187 | 8477 | 136 |
| H(54C) | 114  | 7734 | 9167 | 136 |
| H(55A) | 1382 | 7846 | 2443 | 76  |
| H(55B) | 537  | 7788 | 2249 | 76  |
| H(55C) | 851  | 7925 | 3593 | 76  |
| H(71A) | 4036 | 8993 | 4954 | 208 |
| H(71B) | 3581 | 9093 | 3713 | 208 |

---

**Table S8.** Crystallographic data and collection parameters for **8**.

| <b>8</b>                                  |                                                                     |
|-------------------------------------------|---------------------------------------------------------------------|
| Empirical Formula                         | C <sub>44</sub> H <sub>50</sub> BF <sub>4</sub> NOP <sub>3</sub> Pt |
| FW                                        | 969.65                                                              |
| Space Group                               | Orthorhombic, P2 <sub>1</sub> /n                                    |
| <i>A</i>                                  | 10.5334(14)                                                         |
| <i>B</i>                                  | 44.022(6)                                                           |
| <i>C</i>                                  | 19.544(3)                                                           |
| <i>V</i> , Å <sup>3</sup>                 | 8885(2)                                                             |
| <i>Z</i>                                  | 8                                                                   |
| <i>T</i> , K                              | 100(2)                                                              |
| <i>D</i> <sub>c</sub> , Mg/m <sup>3</sup> | 1.450                                                               |
| $\lambda$ , Å                             | Mo K $\alpha$ (0.71073)                                             |
| $\mu$ , mm <sup>-1</sup>                  | 3.314                                                               |
| <i>R</i> <sub>f</sub> <sup>a</sup>        | 0.0771                                                              |
| <i>R</i> <sub>w</sub> <sup>b</sup>        | 0.1770                                                              |
| GOF <sup>c</sup>                          | 1.031                                                               |

<sup>a</sup> $R_f = \Sigma(F_o - F_c)/\Sigma F_o$ . <sup>b</sup> $R_w = [\Sigma\omega(F_o - F_c)^2/\Sigma\omega F_o^2]^{1/2}$ . <sup>c</sup>GOF =  $[\Sigma\omega(F_o - F_c)^2/(n - p)]^{1/2}$ , where *n* = number of reflections and *p* = number of parameters.

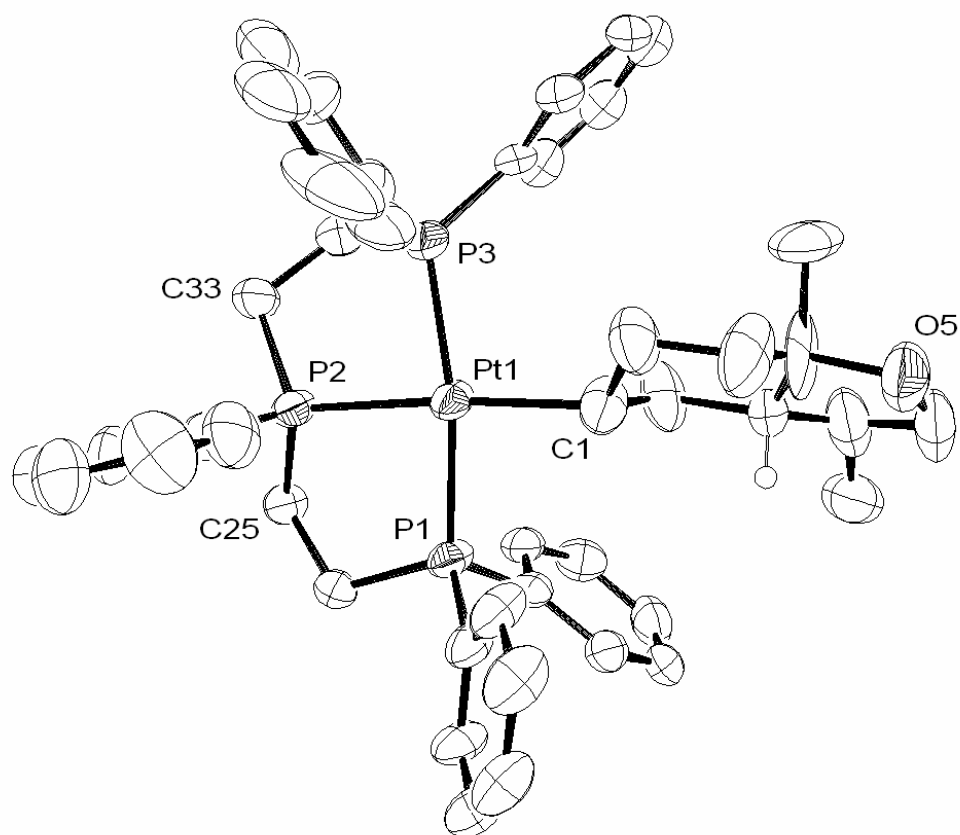

**Figure S4.** ORTEP representation of **8**.  $\text{BF}_4^-$  counter ion and solvent molecule not shown.



**Table S9.** Atomic coordinates ( $\times 10^4$ ) and equivalent isotropic displacement parameters ( $\text{\AA}^2 \times 10^3$ ) for **8**.  $U(\text{eq})$  is defined as one third of the trace of the orthogonalized  $U_{ij}$  tensor.

|       | x         | y       | z        | U(eq)   |
|-------|-----------|---------|----------|---------|
| Pt(1) | 2181(1)   | 604(1)  | 3168(1)  | 43(1)   |
| P(1)  | 3969(3)   | 498(1)  | 3983(2)  | 41(1)   |
| P(2)  | 1144(3)   | 616(1)  | 4094(2)  | 42(1)   |
| C(1)  | 3309(13)  | 597(3)  | 2359(7)  | 61(4)   |
| C(2)  | 2948(15)  | 855(3)  | 1839(7)  | 72(4)   |
| C(3)  | 3885(18)  | 871(4)  | 1318(10) | 111(7)  |
| C(4)  | 4082(18)  | 576(4)  | 1054(8)  | 100(7)  |
| O(5)  | 5043(11)  | 560(3)  | 609(5)   | 88(3)   |
| P(5)  | 7098(4)   | 1679(1) | 10096(2) | 62(1)   |
| C(6)  | 5692(18)  | 287(5)  | 697(9)   | 112(7)  |
| C(7)  | 4967(18)  | 92(4)   | 1166(8)  | 94(5)   |
| C(8)  | 4400(12)  | 333(3)  | 1538(6)  | 58(3)   |
| C(9)  | 3442(15)  | 300(3)  | 2040(7)  | 68(4)   |
| C(10) | 2772(15)  | 520(5)  | 484(9)   | 131(9)  |
| C(11) | 5814(15)  | -151(4) | 1552(8)  | 90(5)   |
| C(12) | 4744(10)  | 146(2)  | 3789(5)  | 40(2)   |
| C(13) | 3999(10)  | -111(3) | 3696(5)  | 45(3)   |
| C(14) | 4483(12)  | -386(3) | 3507(6)  | 53(3)   |
| C(15) | 5784(13)  | -388(3) | 3406(6)  | 58(3)   |
| C(16) | 6504(11)  | -135(3) | 3482(5)  | 45(3)   |
| C(17) | 6022(11)  | 137(3)  | 3668(6)  | 48(3)   |
| C(18) | 5251(10)  | 780(2)  | 4186(6)  | 45(3)   |
| C(19) | 5179(11)  | 1045(3) | 3774(7)  | 54(3)   |
| C(20) | 6153(13)  | 1257(3) | 3918(8)  | 68(4)   |
| C(21) | 7182(13)  | 1219(3) | 4463(8)  | 67(4)   |
| C(22) | 7227(11)  | 960(3)  | 4861(7)  | 57(3)   |
| C(23) | 6288(10)  | 738(3)  | 4721(6)  | 50(3)   |
| C(24) | 3470(10)  | 425(3)  | 4817(5)  | 45(3)   |
| C(25) | 2023(9)   | 344(2)  | 4720(5)  | 41(3)   |
| C(26) | 1150(11)  | 963(3)  | 4571(6)  | 53(3)   |
| C(27) | 1542(15)  | 1235(3) | 4322(8)  | 75(4)   |
| C(28) | 1478(19)  | 1505(3) | 4665(9)  | 94(5)   |
| C(29) | 1093(17)  | 1518(4) | 5289(9)  | 85(5)   |
| C(30) | 677(14)   | 1251(4) | 5548(8)  | 73(4)   |
| C(32) | 697(12)   | 977(3)  | 5194(6)  | 60(3)   |
| C(33) | -553(11)  | 512(3)  | 3806(6)  | 49(3)   |
| C(34) | -813(12)  | 391(4)  | 3045(6)  | 69(4)   |
| C(35) | -580(16)  | 990(4)  | 2470(7)  | 77(5)   |
| C(36) | 203(19)   | 1240(4) | 2561(8)  | 90(6)   |
| C(37) | -260(30)  | 1539(5) | 2553(10) | 158(12) |
| C(38) | -1670(30) | 1553(6) | 2442(9)  | 114(8)  |
| C(39) | -2460(30) | 1305(6) | 2342(9)  | 126(9)  |
| C(40) | -1930(16) | 1033(5) | 2357(8)  | 104(7)  |
| C(41) | -366(11)  | 445(4)  | 1665(6)  | 64(4)   |
| C(42) | -623(12)  | 649(4)  | 1076(7)  | 83(5)   |
| C(43) | -980(13)  | 508(5)  | 415(7)   | 88(6)   |
| C(44) | -1056(14) | 198(5)  | 352(8)   | 88(5)   |
| C(45) | -796(13)  | 19(4)   | 934(8)   | 81(5)   |
| C(46) | -437(13)  | 130(4)  | 1579(8)  | 75(4)   |

|       |           |          |           |         |
|-------|-----------|----------|-----------|---------|
| Pt(2) | 5688(1)   | 1799(1)  | 9090(1)   | 54(1)   |
| P(3)  | 111(3)    | 616(1)   | 2528(2)   | 61(1)   |
| P(4)  | 5380(4)   | 1290(1)  | 9032(2)   | 78(1)   |
| C(51) | 4302(16)  | 1880(4)  | 8147(9)   | 96(3)   |
| C(52) | 4635(17)  | 2086(4)  | 7668(9)   | 103(3)  |
| C(53) | 3596(16)  | 2097(5)  | 6938(9)   | 103(3)  |
| C(54) | 2255(17)  | 2161(5)  | 7074(10)  | 100(2)  |
| O(55) | 1299(11)  | 2135(3)  | 6465(6)   | 97(2)   |
| C(56) | 134(16)   | 2095(4)  | 6709(9)   | 96(3)   |
| C(57) | 507(16)   | 1987(4)  | 7493(9)   | 98(3)   |
| C(58) | 1964(16)  | 1927(4)  | 7527(9)   | 98(2)   |
| C(59) | 2867(15)  | 1908(4)  | 8263(9)   | 94(3)   |
| C(60) | 2150(30)  | 2489(5)  | 7425(13)  | 168(11) |
| C(61) | -290(20)  | 1687(6)  | 7561(12)  | 149(9)  |
| C(62) | 3761(15)  | 1128(3)  | 8695(10)  | 86(5)   |
| C(63) | 3540(16)  | 1022(4)  | 7980(11)  | 112(7)  |
| C(64) | 2312(18)  | 909(4)   | 7689(13)  | 117(7)  |
| C(65) | 1440(20)  | 889(4)   | 8095(14)  | 115(7)  |
| C(66) | 1620(30)  | 993(5)   | 8742(15)  | 129(8)  |
| C(67) | 2840(30)  | 1131(6)  | 9080(12)  | 140(9)  |
| C(68) | 6383(16)  | 1051(4)  | 8704(10)  | 90(5)   |
| C(69) | 6506(18)  | 731(3)   | 8880(9)   | 86(5)   |
| C(70) | 7225(18)  | 550(5)   | 8570(8)   | 99(6)   |
| C(71) | 7890(14)  | 668(3)   | 8022(10)  | 85(5)   |
| C(72) | 7764(18)  | 962(5)   | 7829(13)  | 129(8)  |
| C(73) | 6934(14)  | 1180(3)  | 8217(7)   | 72(4)   |
| C(74) | 5830(40)  | 1167(5)  | 9936(13)  | 250(20) |
| C(75) | 6690(19)  | 1302(3)  | 10382(7)  | 82(5)   |
| C(76) | 8800(16)  | 1668(3)  | 10108(8)  | 70(4)   |
| C(77) | 9683(19)  | 1556(4)  | 10672(9)  | 87(5)   |
| C(78) | 11000(20) | 1559(4)  | 10708(11) | 102(6)  |
| C(79) | 11460(20) | 1678(5)  | 10158(13) | 117(7)  |
| C(80) | 10633(18) | 1815(5)  | 9607(12)  | 115(7)  |
| C(81) | 9313(16)  | 1801(4)  | 9589(10)  | 95(5)   |
| P61   | 6301(8)   | 2282(2)  | 9473(4)   | 63(1)   |
| C821  | 7020(40)  | 1963(9)  | 10780(20) | 63(2)   |
| C831  | 7120(30)  | 2258(6)  | 10427(14) | 64(2)   |
| C841  | 7374(19)  | 2506(4)  | 9066(11)  | 79(2)   |
| C851  | 7621(19)  | 2427(4)  | 8416(11)  | 78(3)   |
| C861  | 8389(19)  | 2613(4)  | 8091(9)   | 79(3)   |
| C871  | 8910(18)  | 2879(4)  | 8416(10)  | 80(3)   |
| C881  | 8663(19)  | 2958(4)  | 9066(10)  | 81(3)   |
| C891  | 7890(20)  | 2772(4)  | 9390(9)   | 80(2)   |
| C901  | 4880(16)  | 2522(4)  | 9497(11)  | 72(2)   |
| C911  | 4580(20)  | 2761(5)  | 9028(11)  | 75(2)   |
| C921  | 3490(20)  | 2938(4)  | 9036(11)  | 77(2)   |
| C931  | 2701(17)  | 2876(4)  | 9512(11)  | 77(2)   |
| C941  | 3003(18)  | 2637(4)  | 9981(10)  | 76(3)   |
| C951  | 4093(19)  | 2460(4)  | 9973(10)  | 74(2)   |
| P62   | 5585(8)   | 2280(2)  | 9552(4)   | 63(1)   |
| C822  | 6770(30)  | 1964(10) | 10730(20) | 63(2)   |
| C832  | 5660(30)  | 2193(6)  | 10524(14) | 64(2)   |
| C842  | 6949(16)  | 2512(4)  | 9491(11)  | 77(2)   |
| C852  | 7251(18)  | 2553(4)  | 8836(9)   | 79(2)   |
| C862  | 8280(19)  | 2739(4)  | 8759(9)   | 81(2)   |
| C872  | 9007(16)  | 2884(4)  | 9337(11)  | 82(3)   |

|      |           |         |          |        |
|------|-----------|---------|----------|--------|
| C882 | 8705(18)  | 2844(4) | 9992(9)  | 83(3)  |
| C892 | 7676(19)  | 2658(5) | 10069(9) | 81(3)  |
| C902 | 4243(16)  | 2535(4) | 9370(12) | 74(2)  |
| C912 | 4376(17)  | 2824(4) | 9103(13) | 75(2)  |
| C922 | 3340(20)  | 3025(3) | 9008(12) | 77(3)  |
| C932 | 2174(17)  | 2939(4) | 9179(11) | 77(3)  |
| C942 | 2040(15)  | 2650(4) | 9445(11) | 77(3)  |
| C952 | 3075(19)  | 2448(3) | 9541(11) | 76(3)  |
| B(1) | 4270(20)  | 1772(4) | 1818(15) | 93(7)  |
| F(1) | 5377(11)  | 1787(3) | 2322(8)  | 166(6) |
| F(2) | 4017(12)  | 2068(2) | 1651(7)  | 142(4) |
| F(3) | 4446(11)  | 1618(3) | 1285(8)  | 134(4) |
| F(4) | 3266(12)  | 1663(3) | 2100(7)  | 145(5) |
| B(2) | 9505(16)  | 440(4)  | 6402(8)  | 60(4)  |
| F(5) | 10681(10) | 450(4)  | 6425(9)  | 218(9) |
| F(6) | 9094(15)  | 740(3)  | 6506(7)  | 158(5) |
| F(7) | 9176(8)   | 247(2)  | 6899(4)  | 80(2)  |
| F(8) | 8704(11)  | 404(3)  | 5790(6)  | 138(5) |

**Table S10.** Bond lengths [ $\text{\AA}$ ] and angles [ $^\circ$ ] for **8**.

|             |           |
|-------------|-----------|
| Pt(1)-C(1)  | 2.158(11) |
| Pt(1)-P(1)  | 2.262(3)  |
| Pt(1)-P(2)  | 2.290(3)  |
| Pt(1)-P(3)  | 2.290(3)  |
| P(1)-C(18)  | 1.819(12) |
| P(1)-C(12)  | 1.827(11) |
| P(1)-C(24)  | 1.838(10) |
| P(2)-C(26)  | 1.787(13) |
| P(2)-C(33)  | 1.825(11) |
| P(2)-C(25)  | 1.827(10) |
| C(1)-C(9)   | 1.467(17) |
| C(1)-C(2)   | 1.522(16) |
| C(2)-C(3)   | 1.553(18) |
| C(3)-C(4)   | 1.43(2)   |
| C(4)-C(8)   | 1.423(17) |
| C(4)-O(5)   | 1.460(15) |
| C(4)-C(10)  | 1.61(3)   |
| O(5)-C(6)   | 1.374(19) |
| P(5)-C(76)  | 1.788(17) |
| P(5)-C(75)  | 1.831(13) |
| P(5)-C821   | 1.850(5)  |
| P(5)-C822   | 1.850(5)  |
| P(5)-Pt(2)  | 2.281(4)  |
| C(6)-C(7)   | 1.56(2)   |
| C(7)-C(8)   | 1.479(19) |
| C(7)-C(11)  | 1.50(2)   |
| C(8)-C(9)   | 1.546(16) |
| C(12)-C(13) | 1.367(15) |
| C(12)-C(17) | 1.412(14) |
| C(13)-C(14) | 1.390(16) |
| C(14)-C(15) | 1.423(17) |
| C(15)-C(16) | 1.338(17) |
| C(16)-C(17) | 1.378(16) |

|             |           |
|-------------|-----------|
| C(18)-C(23) | 1.368(15) |
| C(18)-C(19) | 1.411(14) |
| C(19)-C(20) | 1.375(17) |
| C(20)-C(21) | 1.372(19) |
| C(21)-C(22) | 1.379(17) |
| C(22)-C(23) | 1.377(16) |
| C(24)-C(25) | 1.540(14) |
| C(26)-C(27) | 1.388(17) |
| C(26)-C(32) | 1.393(16) |
| C(27)-C(28) | 1.37(2)   |
| C(28)-C(29) | 1.36(2)   |
| C(29)-C(30) | 1.39(2)   |
| C(30)-C(32) | 1.395(18) |
| C(33)-C(34) | 1.551(16) |
| C(34)-P(3)  | 1.828(14) |
| C(35)-C(36) | 1.36(2)   |
| C(35)-C(40) | 1.41(2)   |
| C(35)-P(3)  | 1.794(16) |
| C(36)-C(37) | 1.40(2)   |
| C(37)-C(38) | 1.46(3)   |
| C(38)-C(39) | 1.36(3)   |
| C(39)-C(40) | 1.32(2)   |
| C(41)-C(46) | 1.40(2)   |
| C(41)-C(42) | 1.440(19) |
| C(41)-P(3)  | 1.825(13) |
| C(42)-C(43) | 1.41(2)   |
| C(43)-C(44) | 1.37(2)   |
| C(44)-C(45) | 1.37(2)   |
| C(45)-C(46) | 1.34(2)   |
| Pt(2)-C(51) | 2.144(17) |
| Pt(2)-P(4)  | 2.267(4)  |
| Pt(2)-P61   | 2.301(8)  |
| Pt(2)-P62   | 2.311(8)  |
| P(4)-C(68)  | 1.701(17) |
| P(4)-C(74)  | 1.82(2)   |
| P(4)-C(62)  | 1.845(16) |
| C(51)-C(52) | 1.40(2)   |
| C(51)-C(59) | 1.58(2)   |
| C(52)-C(53) | 1.62(2)   |
| C(53)-C(54) | 1.51(2)   |
| C(54)-O(55) | 1.40(2)   |
| C(54)-C(58) | 1.43(2)   |
| C(54)-C(60) | 1.61(3)   |
| O(55)-C(56) | 1.412(18) |
| C(56)-C(57) | 1.58(2)   |
| C(57)-C(58) | 1.55(2)   |
| C(57)-C(61) | 1.59(3)   |
| C(58)-C(59) | 1.56(2)   |
| C(62)-C(67) | 1.34(3)   |
| C(62)-C(63) | 1.45(2)   |
| C(63)-C(64) | 1.40(2)   |
| C(64)-C(65) | 1.33(3)   |
| C(65)-C(66) | 1.32(3)   |
| C(66)-C(67) | 1.46(3)   |
| C(68)-C(73) | 1.33(2)   |
| C(68)-C(69) | 1.45(2)   |

|                 |           |
|-----------------|-----------|
| C(69)-C(70)     | 1.33(2)   |
| C(70)-C(71)     | 1.48(2)   |
| C(71)-C(72)     | 1.35(2)   |
| C(72)-C(73)     | 1.59(2)   |
| C(74)-C(75)     | 1.28(2)   |
| C(76)-C(81)     | 1.37(2)   |
| C(76)-C(77)     | 1.39(2)   |
| C(77)-C(78)     | 1.37(3)   |
| C(78)-C(79)     | 1.37(3)   |
| C(79)-C(80)     | 1.38(3)   |
| C(80)-C(81)     | 1.38(2)   |
| P61-C841        | 1.802(15) |
| P61-C901        | 1.841(15) |
| P61-C831        | 1.90(3)   |
| C821-C831       | 1.49(6)   |
| C841-C851       | 1.3900    |
| C841-C891       | 1.3900    |
| C851-C861       | 1.3900    |
| C861-C871       | 1.3900    |
| C871-C881       | 1.3900    |
| C881-C891       | 1.3900    |
| C901-C911       | 1.3900    |
| C901-C951       | 1.3900    |
| C911-C921       | 1.3900    |
| C921-C931       | 1.3900    |
| C931-C941       | 1.3900    |
| C941-C951       | 1.3900    |
| P62-C842        | 1.786(15) |
| P62-C902        | 1.786(15) |
| P62-C832        | 1.93(3)   |
| C822-C832       | 1.53(5)   |
| C842-C852       | 1.3900    |
| C842-C892       | 1.3900    |
| C852-C862       | 1.3900    |
| C862-C872       | 1.3900    |
| C872-C882       | 1.3900    |
| C882-C892       | 1.3900    |
| C902-C912       | 1.3900    |
| C902-C952       | 1.3900    |
| C912-C922       | 1.3900    |
| C922-C932       | 1.3900    |
| C932-C942       | 1.3900    |
| C942-C952       | 1.3900    |
| B(1)-F(3)       | 1.29(2)   |
| B(1)-F(2)       | 1.36(2)   |
| B(1)-F(1)       | 1.37(3)   |
| B(1)-F(4)       | 1.37(2)   |
| B(2)-F(5)       | 1.232(18) |
| B(2)-F(8)       | 1.331(18) |
| B(2)-F(7)       | 1.385(16) |
| B(2)-F(6)       | 1.417(19) |
| C(1)-Pt(1)-P(1) | 90.6(4)   |
| C(1)-Pt(1)-P(2) | 175.2(4)  |
| P(1)-Pt(1)-P(2) | 84.80(10) |

|                   |            |
|-------------------|------------|
| C(1)-Pt(1)-P(3)   | 101.7(4)   |
| P(1)-Pt(1)-P(3)   | 163.75(11) |
| P(2)-Pt(1)-P(3)   | 83.15(10)  |
| C(18)-P(1)-C(12)  | 106.3(5)   |
| C(18)-P(1)-C(24)  | 104.8(5)   |
| C(12)-P(1)-C(24)  | 104.6(5)   |
| C(18)-P(1)-Pt(1)  | 119.5(4)   |
| C(12)-P(1)-Pt(1)  | 112.0(4)   |
| C(24)-P(1)-Pt(1)  | 108.5(4)   |
| C(26)-P(2)-C(33)  | 106.2(6)   |
| C(26)-P(2)-C(25)  | 105.1(5)   |
| C(33)-P(2)-C(25)  | 112.2(5)   |
| C(26)-P(2)-Pt(1)  | 118.6(4)   |
| C(33)-P(2)-Pt(1)  | 109.9(4)   |
| C(25)-P(2)-Pt(1)  | 104.8(3)   |
| C(9)-C(1)-C(2)    | 114.4(11)  |
| C(9)-C(1)-Pt(1)   | 116.0(8)   |
| C(2)-C(1)-Pt(1)   | 112.2(8)   |
| C(1)-C(2)-C(3)    | 111.3(11)  |
| C(4)-C(3)-C(2)    | 110.7(13)  |
| C(8)-C(4)-C(3)    | 118.3(14)  |
| C(8)-C(4)-O(5)    | 105.0(12)  |
| C(3)-C(4)-O(5)    | 115.3(14)  |
| C(8)-C(4)-C(10)   | 113.6(16)  |
| C(3)-C(4)-C(10)   | 103.0(15)  |
| O(5)-C(4)-C(10)   | 100.4(13)  |
| C(6)-O(5)-C(4)    | 110.8(11)  |
| C(76)-P(5)-C(75)  | 105.5(8)   |
| C(76)-P(5)-C821   | 101.4(13)  |
| C(75)-P(5)-C821   | 110.2(17)  |
| C(76)-P(5)-C822   | 109.4(12)  |
| C(75)-P(5)-C822   | 108.8(18)  |
| C821-P(5)-C822    | 8(2)       |
| C(76)-P(5)-Pt(2)  | 119.9(5)   |
| C(75)-P(5)-Pt(2)  | 108.8(6)   |
| C821-P(5)-Pt(2)   | 110.7(16)  |
| C822-P(5)-Pt(2)   | 104.2(15)  |
| O(5)-C(6)-C(7)    | 105.3(12)  |
| C(8)-C(7)-C(11)   | 121.6(13)  |
| C(8)-C(7)-C(6)    | 100.6(14)  |
| C(11)-C(7)-C(6)   | 112.1(15)  |
| C(4)-C(8)-C(7)    | 106.1(11)  |
| C(4)-C(8)-C(9)    | 113.3(11)  |
| C(7)-C(8)-C(9)    | 128.3(12)  |
| C(1)-C(9)-C(8)    | 108.3(10)  |
| C(13)-C(12)-C(17) | 119.8(10)  |
| C(13)-C(12)-P(1)  | 117.5(8)   |
| C(17)-C(12)-P(1)  | 122.5(9)   |
| C(12)-C(13)-C(14) | 121.6(10)  |
| C(13)-C(14)-C(15) | 117.0(11)  |
| C(16)-C(15)-C(14) | 121.4(11)  |
| C(15)-C(16)-C(17) | 121.4(11)  |
| C(16)-C(17)-C(12) | 118.7(11)  |
| C(23)-C(18)-C(19) | 119.5(11)  |
| C(23)-C(18)-P(1)  | 121.5(8)   |
| C(19)-C(18)-P(1)  | 119.0(9)   |

|                   |           |
|-------------------|-----------|
| C(20)-C(19)-C(18) | 119.4(12) |
| C(21)-C(20)-C(19) | 121.4(12) |
| C(20)-C(21)-C(22) | 118.2(12) |
| C(23)-C(22)-C(21) | 122.1(13) |
| C(18)-C(23)-C(22) | 119.5(11) |
| C(25)-C(24)-P(1)  | 112.3(7)  |
| C(24)-C(25)-P(2)  | 106.9(7)  |
| C(27)-C(26)-C(32) | 116.4(12) |
| C(27)-C(26)-P(2)  | 121.6(10) |
| C(32)-C(26)-P(2)  | 121.9(9)  |
| C(28)-C(27)-C(26) | 122.1(14) |
| C(29)-C(28)-C(27) | 121.7(15) |
| C(28)-C(29)-C(30) | 117.6(14) |
| C(29)-C(30)-C(32) | 121.1(13) |
| C(26)-C(32)-C(30) | 120.9(12) |
| C(34)-C(33)-P(2)  | 111.0(8)  |
| C(33)-C(34)-P(3)  | 109.4(9)  |
| C(36)-C(35)-C(40) | 118.6(17) |
| C(36)-C(35)-P(3)  | 120.2(12) |
| C(40)-C(35)-P(3)  | 121.2(17) |
| C(35)-C(36)-C(37) | 124(2)    |
| C(36)-C(37)-C(38) | 113(2)    |
| C(39)-C(38)-C(37) | 124(2)    |
| C(40)-C(39)-C(38) | 119(2)    |
| C(39)-C(40)-C(35) | 122(2)    |
| C(46)-C(41)-C(42) | 121.6(13) |
| C(46)-C(41)-P(3)  | 121.2(11) |
| C(42)-C(41)-P(3)  | 117.1(13) |
| C(43)-C(42)-C(41) | 115.6(17) |
| C(44)-C(43)-C(42) | 121.2(15) |
| C(45)-C(44)-C(43) | 120.1(16) |
| C(46)-C(45)-C(44) | 123.1(18) |
| C(45)-C(46)-C(41) | 118.3(15) |
| C(51)-Pt(2)-P(4)  | 93.1(5)   |
| C(51)-Pt(2)-P(5)  | 175.8(5)  |
| P(4)-Pt(2)-P(5)   | 82.86(13) |
| C(51)-Pt(2)-P61   | 103.1(6)  |
| P(4)-Pt(2)-P61    | 163.3(2)  |
| P(5)-Pt(2)-P61    | 80.8(2)   |
| C(51)-Pt(2)-P62   | 96.2(6)   |
| P(4)-Pt(2)-P62    | 155.3(2)  |
| P(5)-Pt(2)-P62    | 87.0(2)   |
| P61-Pt(2)-P62     | 19.9(2)   |
| C(35)-P(3)-C(41)  | 106.6(7)  |
| C(35)-P(3)-C(34)  | 106.2(7)  |
| C(41)-P(3)-C(34)  | 102.0(7)  |
| C(35)-P(3)-Pt(1)  | 112.7(6)  |
| C(41)-P(3)-Pt(1)  | 123.7(4)  |
| C(34)-P(3)-Pt(1)  | 103.8(4)  |
| C(68)-P(4)-C(74)  | 97.0(15)  |
| C(68)-P(4)-C(62)  | 103.1(8)  |
| C(74)-P(4)-C(62)  | 106.0(12) |
| C(68)-P(4)-Pt(2)  | 122.4(6)  |
| C(74)-P(4)-Pt(2)  | 103.8(8)  |
| C(62)-P(4)-Pt(2)  | 120.9(4)  |
| C(52)-C(51)-C(59) | 114.9(14) |

|                   |           |
|-------------------|-----------|
| C(52)-C(51)-Pt(2) | 117.8(13) |
| C(59)-C(51)-Pt(2) | 113.5(11) |
| C(51)-C(52)-C(53) | 113.3(16) |
| C(54)-C(53)-C(52) | 110.1(15) |
| O(55)-C(54)-C(58) | 105.2(16) |
| O(55)-C(54)-C(53) | 112.0(15) |
| C(58)-C(54)-C(53) | 107.3(15) |
| O(55)-C(54)-C(60) | 109.6(15) |
| C(58)-C(54)-C(60) | 109.9(18) |
| C(53)-C(54)-C(60) | 112.6(18) |
| C(54)-O(55)-C(56) | 104.5(13) |
| O(55)-C(56)-C(57) | 107.4(13) |
| C(58)-C(57)-C(56) | 98.4(13)  |
| C(58)-C(57)-C(61) | 113.3(17) |
| C(56)-C(57)-C(61) | 107.2(16) |
| C(54)-C(58)-C(57) | 100.6(14) |
| C(54)-C(58)-C(59) | 116.3(16) |
| C(57)-C(58)-C(59) | 117.8(14) |
| C(58)-C(59)-C(51) | 107.3(13) |
| C(67)-C(62)-C(63) | 123.4(18) |
| C(67)-C(62)-P(4)  | 120.9(17) |
| C(63)-C(62)-P(4)  | 115.5(15) |
| C(64)-C(63)-C(62) | 117.8(19) |
| C(65)-C(64)-C(63) | 118(2)    |
| C(66)-C(65)-C(64) | 124(2)    |
| C(65)-C(66)-C(67) | 122(2)    |
| C(62)-C(67)-C(66) | 114(2)    |
| C(73)-C(68)-C(69) | 123.5(16) |
| C(73)-C(68)-P(4)  | 113.3(13) |
| C(69)-C(68)-P(4)  | 122.8(14) |
| C(70)-C(69)-C(68) | 120.6(19) |
| C(69)-C(70)-C(71) | 120.8(18) |
| C(72)-C(71)-C(70) | 120.3(17) |
| C(71)-C(72)-C(73) | 119(2)    |
| C(68)-C(73)-C(72) | 116.0(16) |
| C(75)-C(74)-P(4)  | 122.6(17) |
| C(74)-C(75)-P(5)  | 113.1(13) |
| C(81)-C(76)-C(77) | 116.1(16) |
| C(81)-C(76)-P(5)  | 121.3(12) |
| C(77)-C(76)-P(5)  | 122.3(13) |
| C(78)-C(77)-C(76) | 123.3(18) |
| C(79)-C(78)-C(77) | 118.5(18) |
| C(78)-C(79)-C(80) | 120(2)    |
| C(81)-C(80)-C(79) | 119(2)    |
| C(76)-C(81)-C(80) | 122.7(18) |
| C841-P61-C901     | 106.2(10) |
| C841-P61-C831     | 105.1(12) |
| C901-P61-C831     | 102.7(12) |
| C841-P61-Pt(2)    | 121.6(8)  |
| C901-P61-Pt(2)    | 111.2(8)  |
| C831-P61-Pt(2)    | 108.3(8)  |
| C831-C821-P(5)    | 103(2)    |
| C821-C831-P61     | 116.5(19) |
| C851-C841-C891    | 120.0     |
| C851-C841-P61     | 120.8(12) |
| C891-C841-P61     | 119.1(11) |



|                |           |
|----------------|-----------|
| C861-C851-C841 | 120.0     |
| C851-C861-C871 | 120.0     |
| C881-C871-C861 | 120.0     |
| C891-C881-C871 | 120.0     |
| C881-C891-C841 | 120.0     |
| C911-C901-C951 | 120.0     |
| C911-C901-P61  | 120.0(11) |
| C951-C901-P61  | 120.0(11) |
| C901-C911-C921 | 120.0     |
| C911-C921-C931 | 120.0     |
| C941-C931-C921 | 120.0     |
| C931-C941-C951 | 120.0     |
| C941-C951-C901 | 120.0     |
| C842-P62-C902  | 104.0(10) |
| C842-P62-C832  | 107.7(12) |
| C902-P62-C832  | 101.4(11) |
| C842-P62-Pt(2) | 113.4(8)  |
| C902-P62-Pt(2) | 126.4(8)  |
| C832-P62-Pt(2) | 102.0(8)  |
| C832-C822-P(5) | 120(3)    |
| C822-C832-P62  | 106(2)    |
| C852-C842-C892 | 120.0     |
| C852-C842-P62  | 117.9(12) |
| C892-C842-P62  | 122.1(12) |
| C862-C852-C842 | 120.0     |
| C852-C862-C872 | 120.0     |
| C882-C872-C862 | 120.0     |
| C872-C882-C892 | 120.0     |
| C882-C892-C842 | 120.0     |
| C912-C902-C952 | 120.0     |
| C912-C902-P62  | 121.0(11) |
| C952-C902-P62  | 118.9(11) |
| C922-C912-C902 | 120.0     |
| C932-C922-C912 | 120.0     |
| C922-C932-C942 | 120.0     |
| C952-C942-C932 | 120.0     |
| C942-C952-C902 | 120.0     |
| F(3)-B(1)-F(2) | 111(2)    |
| F(3)-B(1)-F(1) | 111.7(16) |
| F(2)-B(1)-F(1) | 103.1(18) |
| F(3)-B(1)-F(4) | 112.7(18) |
| F(2)-B(1)-F(4) | 107.5(15) |
| F(1)-B(1)-F(4) | 110(2)    |
| F(5)-B(2)-F(8) | 119.5(16) |
| F(5)-B(2)-F(7) | 112.7(13) |
| F(8)-B(2)-F(7) | 110.8(14) |
| F(5)-B(2)-F(6) | 107.1(17) |
| F(8)-B(2)-F(6) | 94.7(12)  |
| F(7)-B(2)-F(6) | 110.3(12) |

---

**Table S11.** Anisotropic displacement parameters ( $\text{\AA}^2 \times 10^3$ ) for **8**. The anisotropic displacement factor exponent takes the form:  $-2\pi^2 [h^2 a^{*2} U^{11} + \dots + 2 h k a^* b^* U^{12}]$

|       | $U^{11}$ | $U^{22}$ | $U^{33}$ | $U^{23}$ | $U^{13}$ | $U^{12}$ |
|-------|----------|----------|----------|----------|----------|----------|
| Pt(1) | 32(1)    | 61(1)    | 39(1)    | 21(1)    | 9(1)     | 12(1)    |
| P(1)  | 27(1)    | 52(2)    | 43(2)    | 18(1)    | 6(1)     | 3(1)     |
| P(2)  | 28(1)    | 60(2)    | 38(2)    | 16(1)    | 6(1)     | 2(1)     |
| C(1)  | 65(8)    | 64(8)    | 60(8)    | 29(6)    | 27(7)    | 26(7)    |
| C(2)  | 89(11)   | 77(10)   | 58(8)    | 14(7)    | 33(8)    | 8(8)     |
| C(3)  | 109(14)  | 136(16)  | 110(14)  | 78(13)   | 72(12)   | 46(12)   |
| C(4)  | 138(15)  | 106(12)  | 85(11)   | 68(10)   | 95(12)   | 56(11)   |
| O(5)  | 81(7)    | 121(9)   | 75(7)    | 21(6)    | 43(6)    | 16(7)    |
| P(5)  | 89(3)    | 50(2)    | 49(2)    | 1(2)     | 14(2)    | -9(2)    |
| C(6)  | 101(13)  | 190(20)  | 63(10)   | 15(11)   | 50(10)   | 44(14)   |
| C(7)  | 106(13)  | 130(15)  | 57(9)    | 4(9)     | 41(10)   | 20(11)   |
| C(8)  | 47(7)    | 92(10)   | 39(7)    | 4(6)     | 15(6)    | 9(7)     |
| C(9)  | 107(11)  | 56(8)    | 54(8)    | 20(6)    | 42(8)    | 4(8)     |
| C(10) | 45(9)    | 250(30)  | 89(13)   | 98(15)   | -4(9)    | 10(12)   |
| C(11) | 80(11)   | 116(13)  | 64(10)   | -24(9)   | -7(8)    | 38(10)   |
| C(12) | 34(6)    | 53(7)    | 30(6)    | 15(5)    | 2(5)     | 10(5)    |
| C(13) | 31(6)    | 67(8)    | 36(6)    | 11(5)    | 2(5)     | 1(5)     |
| C(14) | 55(7)    | 51(7)    | 49(7)    | 10(6)    | -1(6)    | 4(6)     |
| C(15) | 69(9)    | 65(8)    | 41(7)    | -3(6)    | 15(6)    | 21(7)    |
| C(16) | 45(6)    | 61(8)    | 29(6)    | 4(5)     | 8(5)     | 4(6)     |
| C(17) | 39(6)    | 70(8)    | 36(6)    | 12(5)    | 8(5)     | -3(6)    |
| C(18) | 35(6)    | 49(6)    | 52(7)    | 15(5)    | 12(5)    | 10(5)    |
| C(19) | 39(6)    | 54(7)    | 73(9)    | 31(6)    | 20(6)    | 9(6)     |
| C(20) | 61(9)    | 48(8)    | 100(11)  | 23(7)    | 30(9)    | -4(7)    |
| C(21) | 47(8)    | 56(8)    | 101(11)  | 3(8)     | 26(8)    | -1(6)    |
| C(22) | 40(7)    | 57(8)    | 73(9)    | 4(6)     | 8(6)     | 13(6)    |
| C(23) | 33(6)    | 55(7)    | 59(8)    | 24(6)    | 3(6)     | 10(5)    |
| C(24) | 39(6)    | 62(7)    | 31(6)    | 7(5)     | 3(5)     | 8(5)     |
| C(25) | 35(6)    | 54(7)    | 35(6)    | 20(5)    | 10(5)    | -4(5)    |
| C(26) | 47(7)    | 60(8)    | 51(7)    | 11(6)    | 9(6)     | -7(6)    |
| C(27) | 84(10)   | 88(11)   | 60(9)    | 10(8)    | 27(8)    | -6(8)    |
| C(28) | 138(16)  | 44(8)    | 98(13)   | -7(8)    | 22(12)   | -4(9)    |
| C(29) | 99(12)   | 75(11)   | 88(12)   | -20(9)   | 31(10)   | 13(9)    |
| C(30) | 66(9)    | 93(11)   | 62(9)    | -12(8)   | 18(8)    | 7(8)     |
| C(32) | 61(8)    | 71(9)    | 54(8)    | 5(6)     | 26(7)    | 2(7)     |
| C(33) | 38(6)    | 67(8)    | 40(6)    | 2(5)     | 3(5)     | -6(5)    |
| C(34) | 36(7)    | 118(12)  | 50(8)    | -13(8)   | 1(6)     | 2(7)     |
| C(35) | 77(10)   | 118(13)  | 33(7)    | 5(8)     | 7(7)     | 52(10)   |
| C(36) | 107(14)  | 93(12)   | 56(9)    | 1(8)     | -17(9)   | 66(11)   |
| C(37) | 240(30)  | 123(17)  | 75(13)   | -9(11)   | -56(16)  | 99(19)   |
| C(38) | 150(20)  | 128(18)  | 53(11)   | 0(11)    | -18(12)  | 77(16)   |
| C(39) | 160(20)  | 170(20)  | 46(10)   | -2(13)   | 3(12)    | 100(20)  |
| C(40) | 83(11)   | 173(18)  | 57(9)    | 18(10)   | 16(9)    | 85(12)   |
| C(41) | 27(6)    | 124(13)  | 38(7)    | -5(7)    | -3(5)    | 26(7)    |
| C(42) | 46(7)    | 154(15)  | 47(8)    | 22(9)    | 6(6)     | 47(9)    |
| C(43) | 52(8)    | 173(18)  | 36(8)    | 8(9)     | 0(7)     | 57(10)   |
| C(44) | 59(9)    | 145(16)  | 60(10)   | -15(11)  | 11(8)    | 34(11)   |
| C(45) | 53(8)    | 130(14)  | 63(10)   | 4(10)    | 16(8)    | 29(9)    |
| C(46) | 54(8)    | 114(13)  | 57(9)    | 2(8)     | 15(7)    | 28(8)    |
| Pt(2) | 68(1)    | 50(1)    | 49(1)    | 7(1)     | 23(1)    | 5(1)     |

|       |         |         |         |         |          |          |
|-------|---------|---------|---------|---------|----------|----------|
| P(3)  | 40(2)   | 105(3)  | 39(2)   | 16(2)   | 7(1)     | 29(2)    |
| P(4)  | 72(3)   | 56(2)   | 92(3)   | -10(2)  | -19(2)   | 10(2)    |
| C(51) | 72(5)   | 124(6)  | 94(6)   | 37(5)   | 20(5)    | 18(5)    |
| C(52) | 78(5)   | 134(6)  | 98(6)   | 33(5)   | 18(5)    | 10(5)    |
| C(53) | 78(5)   | 134(6)  | 96(6)   | 32(5)   | 17(5)    | 9(5)     |
| C(54) | 76(4)   | 128(5)  | 94(5)   | 34(4)   | 15(4)    | 12(4)    |
| O(55) | 75(4)   | 124(5)  | 91(5)   | 28(4)   | 15(4)    | 9(4)     |
| C(56) | 73(5)   | 122(6)  | 94(6)   | 34(5)   | 18(5)    | 17(5)    |
| C(57) | 72(5)   | 126(6)  | 97(6)   | 39(5)   | 20(5)    | 18(5)    |
| C(58) | 73(4)   | 125(5)  | 95(5)   | 41(4)   | 17(4)    | 17(4)    |
| C(59) | 70(5)   | 121(6)  | 92(6)   | 40(5)   | 20(5)    | 20(5)    |
| C(60) | 220(30) | 90(15)  | 170(20) | -40(15) | -40(20)  | 6(16)    |
| C(61) | 119(18) | 180(20) | 130(20) | 42(17)  | -2(15)   | -32(17)  |
| C(62) | 72(10)  | 37(7)   | 134(16) | -16(8)  | -20(10)  | 21(7)    |
| C(63) | 62(10)  | 129(16) | 139(17) | -75(14) | 5(11)    | -5(10)   |
| C(64) | 85(13)  | 94(13)  | 170(20) | -61(14) | 25(14)   | -10(11)  |
| C(65) | 150(20) | 70(12)  | 140(20) | -14(12) | 57(18)   | -31(12)  |
| C(66) | 140(20) | 99(16)  | 160(20) | 54(15)  | 63(19)   | -19(14)  |
| C(67) | 150(20) | 180(20) | 112(17) | 39(16)  | 58(17)   | -30(19)  |
| C(68) | 70(10)  | 81(11)  | 117(14) | -13(10) | 11(10)   | -8(9)    |
| C(69) | 114(13) | 58(9)   | 75(10)  | -17(8)  | -10(10)  | 14(9)    |
| C(70) | 104(13) | 146(16) | 57(10)  | 1(10)   | 41(10)   | 21(12)   |
| C(71) | 60(9)   | 64(10)  | 127(15) | -34(9)  | 9(9)     | 5(7)     |
| C(72) | 79(13)  | 97(15)  | 200(20) | 17(15)  | -3(14)   | 30(11)   |
| C(73) | 82(10)  | 77(10)  | 63(9)   | -11(7)  | 29(8)    | -19(8)   |
| C(74) | 410(50) | 127(19) | 130(20) | 76(16)  | -170(30) | -130(30) |
| C(75) | 159(16) | 47(8)   | 45(8)   | 0(6)    | 35(10)   | -12(9)   |
| C(76) | 91(11)  | 49(7)   | 65(9)   | -1(7)   | 1(9)     | 5(7)     |
| C(77) | 106(14) | 79(11)  | 71(11)  | 1(8)    | 2(10)    | 10(10)   |
| C(78) | 99(15)  | 103(14) | 84(13)  | 4(11)   | -37(12)  | 8(11)    |
| C(79) | 81(13)  | 139(18) | 126(19) | -15(15) | 3(14)    | 9(13)    |
| C(80) | 69(11)  | 156(19) | 118(17) | 37(14)  | 14(11)   | 19(12)   |
| C(81) | 65(10)  | 124(15) | 96(13)  | 10(11)  | 18(10)   | 6(10)    |
| P61   | 62(3)   | 49(2)   | 80(3)   | 7(2)    | 20(3)    | 5(3)     |
| C821  | 62(4)   | 66(3)   | 60(3)   | -6(3)   | 9(3)     | -6(3)    |
| C831  | 63(4)   | 66(3)   | 61(3)   | -6(3)   | 8(3)     | -6(3)    |
| C841  | 70(5)   | 70(4)   | 97(5)   | 6(4)    | 19(4)    | -8(4)    |
| C851  | 69(5)   | 69(5)   | 97(6)   | 6(5)    | 19(5)    | -8(4)    |
| C861  | 70(5)   | 69(5)   | 98(6)   | 7(5)    | 19(5)    | -8(5)    |
| C871  | 71(5)   | 70(5)   | 99(6)   | 7(5)    | 19(5)    | -9(5)    |
| C881  | 72(5)   | 71(5)   | 100(6)  | 6(5)    | 17(5)    | -9(4)    |
| C891  | 72(4)   | 70(4)   | 98(5)   | 5(4)    | 18(4)    | -8(4)    |
| C901  | 75(4)   | 57(4)   | 86(4)   | 4(4)    | 23(4)    | 13(4)    |
| C911  | 79(5)   | 60(5)   | 88(5)   | 4(4)    | 23(4)    | 14(4)    |
| C921  | 81(5)   | 62(5)   | 89(5)   | 5(4)    | 24(4)    | 16(5)    |
| C931  | 81(5)   | 63(5)   | 89(5)   | 6(4)    | 24(4)    | 15(5)    |
| C941  | 80(5)   | 62(5)   | 89(5)   | 5(4)    | 25(5)    | 15(5)    |
| C951  | 78(5)   | 60(5)   | 88(5)   | 5(4)    | 25(4)    | 13(5)    |
| P62   | 62(3)   | 49(2)   | 80(3)   | 7(2)    | 20(3)    | 5(3)     |
| C822  | 62(4)   | 66(3)   | 60(3)   | -6(3)   | 9(3)     | -6(3)    |
| C832  | 63(4)   | 66(3)   | 61(3)   | -6(3)   | 8(3)     | -6(3)    |
| C842  | 70(4)   | 67(4)   | 95(5)   | 5(4)    | 17(4)    | -6(4)    |
| C852  | 70(5)   | 71(5)   | 98(5)   | 6(4)    | 18(4)    | -8(4)    |
| C862  | 72(5)   | 72(4)   | 99(5)   | 6(4)    | 17(4)    | -9(4)    |
| C872  | 73(5)   | 72(5)   | 101(6)  | 5(5)    | 16(5)    | -9(4)    |
| C882  | 74(5)   | 73(5)   | 101(6)  | 5(5)    | 15(5)    | -8(5)    |

|      |         |         |         |         |        |        |
|------|---------|---------|---------|---------|--------|--------|
| C892 | 73(5)   | 71(5)   | 99(6)   | 5(5)    | 16(5)  | -7(4)  |
| C902 | 79(5)   | 59(4)   | 87(5)   | 4(4)    | 23(4)  | 14(4)  |
| C912 | 79(5)   | 61(4)   | 88(5)   | 5(4)    | 23(4)  | 14(4)  |
| C922 | 82(5)   | 63(5)   | 89(5)   | 6(4)    | 24(5)  | 15(5)  |
| C932 | 82(5)   | 63(5)   | 90(5)   | 6(5)    | 24(5)  | 15(5)  |
| C942 | 81(5)   | 63(5)   | 90(5)   | 5(5)    | 24(5)  | 15(5)  |
| C952 | 80(5)   | 61(5)   | 89(5)   | 6(4)    | 23(5)  | 14(5)  |
| B(1) | 79(14)  | 54(11)  | 160(20) | 2(12)   | 53(15) | 19(10) |
| F(1) | 74(7)   | 220(15) | 186(13) | -32(11) | -19(8) | 68(8)  |
| F(2) | 142(10) | 79(7)   | 203(13) | 18(7)   | 35(9)  | 30(7)  |
| F(3) | 109(8)  | 113(8)  | 194(13) | -28(8)  | 60(9)  | 1(7)   |
| F(4) | 126(10) | 133(9)  | 184(12) | 6(9)    | 53(9)  | -43(8) |
| B(2) | 57(10)  | 75(11)  | 47(9)   | 13(8)   | 12(8)  | 23(8)  |
| F(5) | 57(6)   | 350(20) | 257(17) | 226(16) | 56(9)  | 51(9)  |
| F(6) | 180(13) | 184(13) | 125(10) | 26(9)   | 71(10) | 50(11) |
| F(7) | 66(5)   | 94(6)   | 86(6)   | 26(5)   | 29(5)  | 11(4)  |
| F(8) | 130(9)  | 135(9)  | 122(9)  | 60(7)   | -44(8) | -60(8) |

**Table S12.** Hydrogen coordinates ( $\times 10^4$ ) and isotropic displacement parameters ( $\text{\AA}^2 \times 10^3$ ) for **8**.

|        | x    | y    | z    | U(eq) |
|--------|------|------|------|-------|
| H(1)   | 4207 | 647  | 2608 | 73    |
| H(2A)  | 2976 | 1050 | 2094 | 87    |
| H(2B)  | 2052 | 824  | 1577 | 87    |
| H(3A)  | 3520 | 1007 | 926  | 134   |
| H(3B)  | 4727 | 956  | 1557 | 134   |
| H(6A)  | 6607 | 318  | 928  | 135   |
| H(6B)  | 5667 | 187  | 241  | 135   |
| H(7)   | 4234 | -12  | 849  | 113   |
| H(8)   | 5185 | 415  | 1857 | 70    |
| H(9A)  | 2589 | 230  | 1779 | 82    |
| H(9B)  | 3771 | 148  | 2406 | 82    |
| H(10A) | 2808 | 319  | 270  | 196   |
| H(10B) | 2687 | 677  | 123  | 196   |
| H(10C) | 2024 | 528  | 713  | 196   |
| H(11A) | 6588 | -58  | 1835 | 134   |
| H(11B) | 6072 | -293 | 1217 | 134   |
| H(11C) | 5336 | -261 | 1856 | 134   |
| H(13)  | 3130 | -102 | 3761 | 54    |
| H(14)  | 3967 | -565 | 3448 | 64    |
| H(15)  | 6149 | -572 | 3282 | 69    |
| H(16)  | 7367 | -144 | 3407 | 54    |
| H(17)  | 6539 | 316  | 3714 | 57    |
| H(19)  | 4464 | 1076 | 3400 | 65    |
| H(20)  | 6112 | 1433 | 3634 | 82    |
| H(21)  | 7845 | 1368 | 4563 | 80    |
| H(22)  | 7928 | 933  | 5245 | 68    |
| H(23)  | 6360 | 558  | 4995 | 60    |
| H(24A) | 3991 | 255  | 5060 | 54    |
| H(24B) | 3648 | 607  | 5117 | 54    |
| H(25A) | 1731 | 359  | 5170 | 49    |

|        |       |      |       |     |
|--------|-------|------|-------|-----|
| H(25B) | 1869  | 134  | 4540  | 49  |
| H(27)  | 1864  | 1235 | 3901  | 90  |
| H(28)  | 1708  | 1688 | 4460  | 112 |
| H(29)  | 1109  | 1704 | 5539  | 103 |
| H(30)  | 373   | 1255 | 5975  | 88  |
| H(32)  | 397   | 797  | 5380  | 72  |
| H(33A) | -784  | 353  | 4119  | 59  |
| H(33B) | -1106 | 691  | 3835  | 59  |
| H(34A) | -1749 | 405  | 2841  | 83  |
| H(34B) | -553  | 175  | 3041  | 83  |
| H(36)  | 1113  | 1209 | 2635  | 108 |
| H(37)  | 282   | 1713 | 2613  | 189 |
| H(38)  | -2064 | 1748 | 2438  | 137 |
| H(39)  | -3375 | 1328 | 2264  | 152 |
| H(40)  | -2478 | 860  | 2289  | 125 |
| H(42)  | -557  | 863  | 1128  | 99  |
| H(43)  | -1171 | 631  | 8     | 106 |
| H(44)  | -1290 | 108  | -97   | 106 |
| H(45)  | -874  | -195 | 876   | 98  |
| H(46)  | -236  | -2   | 1971  | 90  |
| H(51)  | 4288  | 1682 | 7896  | 115 |
| H(52A) | 5492  | 2029 | 7571  | 124 |
| H(52B) | 4713  | 2291 | 7878  | 124 |
| H(53A) | 3843  | 2258 | 6636  | 123 |
| H(53B) | 3596  | 1901 | 6692  | 123 |
| H(56A) | -413  | 1940 | 6424  | 116 |
| H(56B) | -354  | 2288 | 6677  | 116 |
| H(57)  | 354   | 2149 | 7828  | 117 |
| H(58)  | 2036  | 1729 | 7288  | 117 |
| H(59A) | 2639  | 1729 | 8521  | 113 |
| H(59B) | 2771  | 2093 | 8538  | 113 |
| H(60A) | 2091  | 2647 | 7067  | 252 |
| H(60B) | 2922  | 2523 | 7788  | 252 |
| H(60C) | 1377  | 2495 | 7632  | 252 |
| H(61A) | -377  | 1568 | 7131  | 223 |
| H(61B) | -1159 | 1742 | 7636  | 223 |
| H(61C) | 155   | 1567 | 7957  | 223 |
| H(63)  | 4208  | 1029 | 7716  | 134 |
| H(64)  | 2106  | 848  | 7214  | 141 |
| H(65)  | 636   | 794  | 7909  | 138 |
| H(66)  | 941   | 976  | 8994  | 155 |
| H(67)  | 2976  | 1217 | 9535  | 168 |
| H(69)  | 6067  | 651  | 9221  | 104 |
| H(70)  | 7316  | 342  | 8701  | 119 |
| H(71)  | 8407  | 536  | 7807  | 102 |
| H(72)  | 8164  | 1037 | 7467  | 155 |
| H(73)  | 6835  | 1391 | 8109  | 86  |
| H(74A) | 5022  | 1168 | 10127 | 303 |
| H(74B) | 6098  | 952  | 9927  | 303 |
| H(75A) | 7483  | 1175 | 10474 | 98  |
| H(75B) | 6379  | 1322 | 10826 | 98  |
| H(77)  | 9363  | 1473 | 11053 | 105 |
| H(78)  | 11573 | 1481 | 11105 | 123 |
| H(79)  | 12362 | 1666 | 10154 | 141 |
| H(80)  | 10961 | 1917 | 9250  | 138 |
| H(81)  | 8740  | 1887 | 9200  | 114 |

|       |      |      |       |     |
|-------|------|------|-------|-----|
| H82A1 | 6189 | 1948 | 10947 | 76  |
| H82B1 | 7743 | 1937 | 11186 | 76  |
| H83A1 | 8050 | 2306 | 10463 | 77  |
| H83B1 | 6748 | 2418 | 10684 | 77  |
| H851  | 7265 | 2246 | 8194  | 94  |
| H861  | 8558 | 2559 | 7647  | 94  |
| H871  | 9435 | 3006 | 8194  | 96  |
| H881  | 9019 | 3139 | 9288  | 97  |
| H891  | 7726 | 2826 | 9835  | 96  |
| H911  | 5116 | 2803 | 8703  | 90  |
| H921  | 3282 | 3101 | 8716  | 92  |
| H931  | 1957 | 2997 | 9517  | 92  |
| H941  | 2465 | 2595 | 10306 | 91  |
| H951  | 4299 | 2297 | 10293 | 89  |
| H82A2 | 6600 | 1852 | 11146 | 76  |
| H82B2 | 7570 | 2082 | 10888 | 76  |
| H83A2 | 5831 | 2380 | 10807 | 77  |
| H83B2 | 4828 | 2105 | 10595 | 77  |
| H852  | 6755 | 2453 | 8441  | 95  |
| H862  | 8487 | 2766 | 8311  | 97  |
| H872  | 9710 | 3011 | 9285  | 98  |
| H882  | 9201 | 2943 | 10387 | 100 |
| H892  | 7469 | 2630 | 10516 | 97  |
| H912  | 5174 | 2883 | 8987  | 90  |
| H922  | 3432 | 3223 | 8826  | 92  |
| H932  | 1466 | 3077 | 9114  | 93  |
| H942  | 1242 | 2591 | 9562  | 92  |
| H952  | 2984 | 2251 | 9723  | 91  |

**Table S13.** Torsion angles [ $^{\circ}$ ] for **8**.

|                       |            |
|-----------------------|------------|
| C(1)-Pt(1)-P(1)-C(18) | 67.9(5)    |
| P(2)-Pt(1)-P(1)-C(18) | -110.6(4)  |
| P(3)-Pt(1)-P(1)-C(18) | -152.9(5)  |
| C(1)-Pt(1)-P(1)-C(12) | -57.2(5)   |
| P(2)-Pt(1)-P(1)-C(12) | 124.2(4)   |
| P(3)-Pt(1)-P(1)-C(12) | 81.9(6)    |
| C(1)-Pt(1)-P(1)-C(24) | -172.2(5)  |
| P(2)-Pt(1)-P(1)-C(24) | 9.3(4)     |
| P(3)-Pt(1)-P(1)-C(24) | -33.0(6)   |
| C(1)-Pt(1)-P(2)-C(26) | 68(4)      |
| P(1)-Pt(1)-P(2)-C(26) | 85.8(5)    |
| P(3)-Pt(1)-P(2)-C(26) | -105.1(5)  |
| C(1)-Pt(1)-P(2)-C(33) | -169(4)    |
| P(1)-Pt(1)-P(2)-C(33) | -151.8(4)  |
| P(3)-Pt(1)-P(2)-C(33) | 17.3(4)    |
| C(1)-Pt(1)-P(2)-C(25) | -49(4)     |
| P(1)-Pt(1)-P(2)-C(25) | -31.1(4)   |
| P(3)-Pt(1)-P(2)-C(25) | 138.0(4)   |
| P(1)-Pt(1)-C(1)-C(9)  | 88.4(10)   |
| P(2)-Pt(1)-C(1)-C(9)  | 106(4)     |
| P(3)-Pt(1)-C(1)-C(9)  | -80.9(10)  |
| P(1)-Pt(1)-C(1)-C(2)  | -137.6(11) |
| P(2)-Pt(1)-C(1)-C(2)  | -120(4)    |

|                         |            |
|-------------------------|------------|
| P(3)-Pt(1)-C(1)-C(2)    | 53.1(11)   |
| C(9)-C(1)-C(2)-C(3)     | -52.6(19)  |
| Pt(1)-C(1)-C(2)-C(3)    | 172.7(12)  |
| C(1)-C(2)-C(3)-C(4)     | 46(2)      |
| C(2)-C(3)-C(4)-C(8)     | -49(2)     |
| C(2)-C(3)-C(4)-O(5)     | -174.5(14) |
| C(2)-C(3)-C(4)-C(10)    | 77.2(15)   |
| C(8)-C(4)-O(5)-C(6)     | 14(2)      |
| C(3)-C(4)-O(5)-C(6)     | 146.0(17)  |
| C(10)-C(4)-O(5)-C(6)    | -104.1(16) |
| C(4)-O(5)-C(6)-C(7)     | 8(2)       |
| O(5)-C(6)-C(7)-C(8)     | -25.7(18)  |
| O(5)-C(6)-C(7)-C(11)    | -156.4(14) |
| C(3)-C(4)-C(8)-C(7)     | -161.4(16) |
| O(5)-C(4)-C(8)-C(7)     | -31.1(19)  |
| C(10)-C(4)-C(8)-C(7)    | 77.6(16)   |
| C(3)-C(4)-C(8)-C(9)     | 53(2)      |
| O(5)-C(4)-C(8)-C(9)     | -176.9(13) |
| C(10)-C(4)-C(8)-C(9)    | -68.2(17)  |
| C(11)-C(7)-C(8)-C(4)    | 159.1(17)  |
| C(6)-C(7)-C(8)-C(4)     | 34.7(18)   |
| C(11)-C(7)-C(8)-C(9)    | -62(2)     |
| C(6)-C(7)-C(8)-C(9)     | 173.6(14)  |
| C(2)-C(1)-C(9)-C(8)     | 53.4(16)   |
| Pt(1)-C(1)-C(9)-C(8)    | -173.6(9)  |
| C(4)-C(8)-C(9)-C(1)     | -51.7(18)  |
| C(7)-C(8)-C(9)-C(1)     | 171.7(14)  |
| C(18)-P(1)-C(12)-C(13)  | 172.8(8)   |
| C(24)-P(1)-C(12)-C(13)  | 62.3(9)    |
| Pt(1)-P(1)-C(12)-C(13)  | -55.0(9)   |
| C(18)-P(1)-C(12)-C(17)  | -13.5(10)  |
| C(24)-P(1)-C(12)-C(17)  | -124.0(9)  |
| Pt(1)-P(1)-C(12)-C(17)  | 118.7(8)   |
| C(17)-C(12)-C(13)-C(14) | 2.4(16)    |
| P(1)-C(12)-C(13)-C(14)  | 176.2(8)   |
| C(12)-C(13)-C(14)-C(15) | -0.8(16)   |
| C(13)-C(14)-C(15)-C(16) | -0.7(17)   |
| C(14)-C(15)-C(16)-C(17) | 0.6(18)    |
| C(15)-C(16)-C(17)-C(12) | 0.9(16)    |
| C(13)-C(12)-C(17)-C(16) | -2.4(15)   |
| P(1)-C(12)-C(17)-C(16)  | -176.0(8)  |
| C(12)-P(1)-C(18)-C(23)  | -58.8(10)  |
| C(24)-P(1)-C(18)-C(23)  | 51.6(11)   |
| Pt(1)-P(1)-C(18)-C(23)  | 173.3(8)   |
| C(12)-P(1)-C(18)-C(19)  | 120.3(9)   |
| C(24)-P(1)-C(18)-C(19)  | -129.2(9)  |
| Pt(1)-P(1)-C(18)-C(19)  | -7.5(11)   |
| C(23)-C(18)-C(19)-C(20) | 0.0(18)    |
| P(1)-C(18)-C(19)-C(20)  | -179.2(10) |
| C(18)-C(19)-C(20)-C(21) | -1(2)      |
| C(19)-C(20)-C(21)-C(22) | 1(2)       |
| C(20)-C(21)-C(22)-C(23) | 0.9(19)    |
| C(19)-C(18)-C(23)-C(22) | 1.7(17)    |
| P(1)-C(18)-C(23)-C(22)  | -179.1(9)  |
| C(21)-C(22)-C(23)-C(18) | -2.2(18)   |
| C(18)-P(1)-C(24)-C(25)  | 148.3(8)   |

|                         |            |
|-------------------------|------------|
| C(12)-P(1)-C(24)-C(25)  | -100.0(8)  |
| Pt(1)-P(1)-C(24)-C(25)  | 19.7(9)    |
| P(1)-C(24)-C(25)-P(2)   | -45.2(10)  |
| C(26)-P(2)-C(25)-C(24)  | -75.0(8)   |
| C(33)-P(2)-C(25)-C(24)  | 170.0(7)   |
| Pt(1)-P(2)-C(25)-C(24)  | 50.7(8)    |
| C(33)-P(2)-C(26)-C(27)  | -111.9(12) |
| C(25)-P(2)-C(26)-C(27)  | 129.1(11)  |
| Pt(1)-P(2)-C(26)-C(27)  | 12.4(13)   |
| C(33)-P(2)-C(26)-C(32)  | 64.6(12)   |
| C(25)-P(2)-C(26)-C(32)  | -54.4(12)  |
| Pt(1)-P(2)-C(26)-C(32)  | -171.1(9)  |
| C(32)-C(26)-C(27)-C(28) | -1(2)      |
| P(2)-C(26)-C(27)-C(28)  | 176.1(13)  |
| C(26)-C(27)-C(28)-C(29) | 4(3)       |
| C(27)-C(28)-C(29)-C(30) | -4(3)      |
| C(28)-C(29)-C(30)-C(32) | 2(2)       |
| C(27)-C(26)-C(32)-C(30) | -2(2)      |
| P(2)-C(26)-C(32)-C(30)  | -178.2(10) |
| C(29)-C(30)-C(32)-C(26) | 1(2)       |
| C(26)-P(2)-C(33)-C(34)  | 138.8(9)   |
| C(25)-P(2)-C(33)-C(34)  | -107.0(10) |
| Pt(1)-P(2)-C(33)-C(34)  | 9.3(10)    |
| P(2)-C(33)-C(34)-P(3)   | -39.2(11)  |
| C(40)-C(35)-C(36)-C(37) | 0(2)       |
| P(3)-C(35)-C(36)-C(37)  | -177.2(13) |
| C(35)-C(36)-C(37)-C(38) | 1(3)       |
| C(36)-C(37)-C(38)-C(39) | -1(3)      |
| C(37)-C(38)-C(39)-C(40) | 1(3)       |
| C(38)-C(39)-C(40)-C(35) | 0(3)       |
| C(36)-C(35)-C(40)-C(39) | -1(2)      |
| P(3)-C(35)-C(40)-C(39)  | 177.0(13)  |
| C(46)-C(41)-C(42)-C(43) | 1.5(17)    |
| P(3)-C(41)-C(42)-C(43)  | 179.5(9)   |
| C(41)-C(42)-C(43)-C(44) | -0.7(19)   |
| C(42)-C(43)-C(44)-C(45) | 1(2)       |
| C(43)-C(44)-C(45)-C(46) | -1(2)      |
| C(44)-C(45)-C(46)-C(41) | 2(2)       |
| C(42)-C(41)-C(46)-C(45) | -2.2(19)   |
| P(3)-C(41)-C(46)-C(45)  | 179.8(10)  |
| C(76)-P(5)-Pt(2)-C(51)  | 118(7)     |
| C(75)-P(5)-Pt(2)-C(51)  | -3(7)      |
| C821-P(5)-Pt(2)-C(51)   | -124(7)    |
| C822-P(5)-Pt(2)-C(51)   | -119(7)    |
| C(76)-P(5)-Pt(2)-P(4)   | 101.4(5)   |
| C(75)-P(5)-Pt(2)-P(4)   | -20.0(6)   |
| C821-P(5)-Pt(2)-P(4)    | -141.2(15) |
| C822-P(5)-Pt(2)-P(4)    | -135.9(16) |
| C(76)-P(5)-Pt(2)-P61    | -82.2(5)   |
| C(75)-P(5)-Pt(2)-P61    | 156.5(6)   |
| C821-P(5)-Pt(2)-P61     | 35.2(15)   |
| C822-P(5)-Pt(2)-P61     | 40.5(16)   |
| C(76)-P(5)-Pt(2)-P62    | -101.3(5)  |
| C(75)-P(5)-Pt(2)-P62    | 137.4(6)   |
| C821-P(5)-Pt(2)-P62     | 16.2(15)   |
| C822-P(5)-Pt(2)-P62     | 21.4(16)   |



|                         |            |
|-------------------------|------------|
| C(36)-C(35)-P(3)-C(41)  | -115.7(12) |
| C(40)-C(35)-P(3)-C(41)  | 66.8(12)   |
| C(36)-C(35)-P(3)-C(34)  | 136.1(12)  |
| C(40)-C(35)-P(3)-C(34)  | -41.4(13)  |
| C(36)-C(35)-P(3)-Pt(1)  | 23.1(13)   |
| C(40)-C(35)-P(3)-Pt(1)  | -154.4(10) |
| C(46)-C(41)-P(3)-C(35)  | -155.1(11) |
| C(42)-C(41)-P(3)-C(35)  | 26.9(11)   |
| C(46)-C(41)-P(3)-C(34)  | -43.9(11)  |
| C(42)-C(41)-P(3)-C(34)  | 138.0(10)  |
| C(46)-C(41)-P(3)-Pt(1)  | 71.8(12)   |
| C(42)-C(41)-P(3)-Pt(1)  | -106.2(9)  |
| C(33)-C(34)-P(3)-C(35)  | -67.1(11)  |
| C(33)-C(34)-P(3)-C(41)  | -178.5(9)  |
| C(33)-C(34)-P(3)-Pt(1)  | 52.0(9)    |
| C(1)-Pt(1)-P(3)-C(35)   | -100.5(6)  |
| P(1)-Pt(1)-P(3)-C(35)   | 121.4(6)   |
| P(2)-Pt(1)-P(3)-C(35)   | 78.9(5)    |
| C(1)-Pt(1)-P(3)-C(41)   | 30.1(7)    |
| P(1)-Pt(1)-P(3)-C(41)   | -108.0(7)  |
| P(2)-Pt(1)-P(3)-C(41)   | -150.4(7)  |
| C(1)-Pt(1)-P(3)-C(34)   | 145.0(6)   |
| P(1)-Pt(1)-P(3)-C(34)   | 6.9(7)     |
| P(2)-Pt(1)-P(3)-C(34)   | -35.5(5)   |
| C(51)-Pt(2)-P(4)-C(68)  | 98.0(9)    |
| P(5)-Pt(2)-P(4)-C(68)   | -83.2(8)   |
| P61-Pt(2)-P(4)-C(68)    | -95.6(11)  |
| P62-Pt(2)-P(4)-C(68)    | -149.9(9)  |
| C(51)-Pt(2)-P(4)-C(74)  | -154.3(15) |
| P(5)-Pt(2)-P(4)-C(74)   | 24.5(14)   |
| P61-Pt(2)-P(4)-C(74)    | 12.2(17)   |
| P62-Pt(2)-P(4)-C(74)    | -42.1(15)  |
| C(51)-Pt(2)-P(4)-C(62)  | -35.7(9)   |
| P(5)-Pt(2)-P(4)-C(62)   | 143.1(8)   |
| P61-Pt(2)-P(4)-C(62)    | 130.7(11)  |
| P62-Pt(2)-P(4)-C(62)    | 76.4(10)   |
| P(4)-Pt(2)-C(51)-C(52)  | -136.0(15) |
| P(5)-Pt(2)-C(51)-C(52)  | -153(6)    |
| P61-Pt(2)-C(51)-C(52)   | 48.0(16)   |
| P62-Pt(2)-C(51)-C(52)   | 67.0(16)   |
| P(4)-Pt(2)-C(51)-C(59)  | 85.7(13)   |
| P(5)-Pt(2)-C(51)-C(59)  | 69(7)      |
| P61-Pt(2)-C(51)-C(59)   | -90.3(13)  |
| P62-Pt(2)-C(51)-C(59)   | -71.4(13)  |
| C(59)-C(51)-C(52)-C(53) | -49(2)     |
| Pt(2)-C(51)-C(52)-C(53) | 172.9(12)  |
| C(51)-C(52)-C(53)-C(54) | 55(2)      |
| C(52)-C(53)-C(54)-O(55) | -172.5(14) |
| C(52)-C(53)-C(54)-C(58) | -58(2)     |
| C(52)-C(53)-C(54)-C(60) | 63(2)      |
| C(58)-C(54)-O(55)-C(56) | 44.1(18)   |
| C(53)-C(54)-O(55)-C(56) | 160.3(15)  |
| C(60)-C(54)-O(55)-C(56) | -74.0(19)  |
| C(54)-O(55)-C(56)-C(57) | -19.0(19)  |
| O(55)-C(56)-C(57)-C(58) | -10(2)     |
| O(55)-C(56)-C(57)-C(61) | -127.6(17) |

|                         |            |
|-------------------------|------------|
| O(55)-C(54)-C(58)-C(57) | -50.0(19)  |
| C(53)-C(54)-C(58)-C(57) | -169.4(17) |
| C(60)-C(54)-C(58)-C(57) | 68(2)      |
| O(55)-C(54)-C(58)-C(59) | -178.4(14) |
| C(53)-C(54)-C(58)-C(59) | 62(2)      |
| C(60)-C(54)-C(58)-C(59) | -61(2)     |
| C(56)-C(57)-C(58)-C(54) | 34(2)      |
| C(61)-C(57)-C(58)-C(54) | 147.4(18)  |
| C(56)-C(57)-C(58)-C(59) | 161.9(16)  |
| C(61)-C(57)-C(58)-C(59) | -85(2)     |
| C(54)-C(58)-C(59)-C(51) | -55(2)     |
| C(57)-C(58)-C(59)-C(51) | -174.3(16) |
| C(52)-C(51)-C(59)-C(58) | 47(2)      |
| Pt(2)-C(51)-C(59)-C(58) | -173.4(12) |
| C(68)-P(4)-C(62)-C(67)  | 143.9(17)  |
| C(74)-P(4)-C(62)-C(67)  | 43(2)      |
| Pt(2)-P(4)-C(62)-C(67)  | -75.0(18)  |
| C(68)-P(4)-C(62)-C(63)  | -40.8(15)  |
| C(74)-P(4)-C(62)-C(63)  | -142.1(17) |
| Pt(2)-P(4)-C(62)-C(63)  | 100.4(12)  |
| C(67)-C(62)-C(63)-C(64) | -2(3)      |
| P(4)-C(62)-C(63)-C(64)  | -177.4(15) |
| C(62)-C(63)-C(64)-C(65) | -4(3)      |
| C(63)-C(64)-C(65)-C(66) | 6(4)       |
| C(64)-C(65)-C(66)-C(67) | -2(4)      |
| C(63)-C(62)-C(67)-C(66) | 5(3)       |
| P(4)-C(62)-C(67)-C(66)  | -179.5(14) |
| C(65)-C(66)-C(67)-C(62) | -4(3)      |
| C(74)-P(4)-C(68)-C(73)  | -140.6(15) |
| C(62)-P(4)-C(68)-C(73)  | 111.1(14)  |
| Pt(2)-P(4)-C(68)-C(73)  | -29.4(16)  |
| C(74)-P(4)-C(68)-C(69)  | 45.9(17)   |
| C(62)-P(4)-C(68)-C(69)  | -62.4(16)  |
| Pt(2)-P(4)-C(68)-C(69)  | 157.2(11)  |
| C(73)-C(68)-C(69)-C(70) | 2(3)       |
| P(4)-C(68)-C(69)-C(70)  | 174.8(14)  |
| C(68)-C(69)-C(70)-C(71) | -2(3)      |
| C(69)-C(70)-C(71)-C(72) | 0(3)       |
| C(70)-C(71)-C(72)-C(73) | 2(3)       |
| C(69)-C(68)-C(73)-C(72) | 0(2)       |
| P(4)-C(68)-C(73)-C(72)  | -173.7(12) |
| C(71)-C(72)-C(73)-C(68) | -2(2)      |
| C(68)-P(4)-C(74)-C(75)  | 95(3)      |
| C(62)-P(4)-C(74)-C(75)  | -160(3)    |
| Pt(2)-P(4)-C(74)-C(75)  | -31(4)     |
| P(4)-C(74)-C(75)-P(5)   | 16(4)      |
| C(76)-P(5)-C(75)-C(74)  | -122(2)    |
| C821-P(5)-C(75)-C(74)   | 129(3)     |
| C822-P(5)-C(75)-C(74)   | 121(3)     |
| Pt(2)-P(5)-C(75)-C(74)  | 8(3)       |
| C(75)-P(5)-C(76)-C(81)  | 139.4(13)  |
| C821-P(5)-C(76)-C(81)   | -106(2)    |
| C822-P(5)-C(76)-C(81)   | -104(2)    |
| Pt(2)-P(5)-C(76)-C(81)  | 16.4(15)   |
| C(75)-P(5)-C(76)-C(77)  | -47.8(14)  |
| C821-P(5)-C(76)-C(77)   | 67(2)      |

|                         |            |
|-------------------------|------------|
| C822-P(5)-C(76)-C(77)   | 69(2)      |
| Pt(2)-P(5)-C(76)-C(77)  | -170.8(10) |
| C(81)-C(76)-C(77)-C(78) | -3(2)      |
| P(5)-C(76)-C(77)-C(78)  | -176.7(14) |
| C(76)-C(77)-C(78)-C(79) | 0(3)       |
| C(77)-C(78)-C(79)-C(80) | 6(3)       |
| C(78)-C(79)-C(80)-C(81) | -7(3)      |
| C(77)-C(76)-C(81)-C(80) | 2(3)       |
| P(5)-C(76)-C(81)-C(80)  | 175.3(16)  |
| C(79)-C(80)-C(81)-C(76) | 3(3)       |
| C(51)-Pt(2)-P61-C841    | -75.4(10)  |
| P(4)-Pt(2)-P61-C841     | 118.5(11)  |
| P(5)-Pt(2)-P61-C841     | 106.1(9)   |
| P62-Pt(2)-P61-C841      | -146.9(15) |
| C(51)-Pt(2)-P61-C901    | 50.7(9)    |
| P(4)-Pt(2)-P61-C901     | -115.3(10) |
| P(5)-Pt(2)-P61-C901     | -127.8(8)  |
| P62-Pt(2)-P61-C901      | -20.8(10)  |
| C(51)-Pt(2)-P61-C831    | 162.9(10)  |
| P(4)-Pt(2)-P61-C831     | -3.2(14)   |
| P(5)-Pt(2)-P61-C831     | -15.6(9)   |
| P62-Pt(2)-P61-C831      | 91.4(13)   |
| C(76)-P(5)-C821-C831    | 79(2)      |
| C(75)-P(5)-C821-C831    | -169.6(19) |
| C822-P(5)-C821-C831     | -88(24)    |
| Pt(2)-P(5)-C821-C831    | -49(2)     |
| P(5)-C821-C831-P61      | 36(3)      |
| C841-P61-C831-C821      | -142(2)    |
| C901-P61-C831-C821      | 107(2)     |
| Pt(2)-P61-C831-C821     | -11(2)     |
| C901-P61-C841-C851      | -113.1(13) |
| C831-P61-C841-C851      | 138.5(13)  |
| Pt(2)-P61-C841-C851     | 15.2(15)   |
| C901-P61-C841-C891      | 63.0(14)   |
| C831-P61-C841-C891      | -45.4(15)  |
| Pt(2)-P61-C841-C891     | -168.6(9)  |
| C891-C841-C851-C861     | 0.0        |
| P61-C841-C851-C861      | 176.1(16)  |
| C841-C851-C861-C871     | 0.0        |
| C851-C861-C871-C881     | 0.0        |
| C861-C871-C881-C891     | 0.0        |
| C871-C881-C891-C841     | 0.0        |
| C851-C841-C891-C881     | 0.0        |
| P61-C841-C891-C881      | -176.2(16) |
| C841-P61-C901-C911      | 23.2(15)   |
| C831-P61-C901-C911      | 133.3(13)  |
| Pt(2)-P61-C901-C911     | -111.0(11) |
| C841-P61-C901-C951      | -158.3(13) |
| C831-P61-C901-C951      | -48.2(15)  |
| Pt(2)-P61-C901-C951     | 67.5(13)   |
| C951-C901-C911-C921     | 0.0        |
| P61-C901-C911-C921      | 178.5(16)  |
| C901-C911-C921-C931     | 0.0        |
| C911-C921-C931-C941     | 0.0        |
| C921-C931-C941-C951     | 0.0        |
| C931-C941-C951-C901     | 0.0        |

|                      |            |
|----------------------|------------|
| C911-C901-C951-C941  | 0.0        |
| P61-C901-C951-C941   | -178.5(16) |
| C(51)-Pt(2)-P62-C842 | -104.3(9)  |
| P(4)-Pt(2)-P62-C842  | 144.2(8)   |
| P(5)-Pt(2)-P62-C842  | 78.4(8)    |
| P61-Pt(2)-P62-C842   | 7.4(10)    |
| C(51)-Pt(2)-P62-C902 | 26.1(10)   |
| P(4)-Pt(2)-P62-C902  | -85.4(11)  |
| P(5)-Pt(2)-P62-C902  | -151.2(10) |
| P61-Pt(2)-P62-C902   | 137.8(15)  |
| C(51)-Pt(2)-P62-C832 | 140.2(10)  |
| P(4)-Pt(2)-P62-C832  | 28.7(12)   |
| P(5)-Pt(2)-P62-C832  | -37.1(9)   |
| P61-Pt(2)-P62-C832   | -108.1(14) |
| C(76)-P(5)-C822-C832 | 134(3)     |
| C(75)-P(5)-C822-C832 | -112(3)    |
| C821-P(5)-C822-C832  | 147(27)    |
| Pt(2)-P(5)-C822-C832 | 4(4)       |
| P(5)-C822-C832-P62   | -34(4)     |
| C842-P62-C832-C822   | -73(2)     |
| C902-P62-C832-C822   | 178(2)     |
| Pt(2)-P62-C832-C822  | 47(2)      |
| C902-P62-C842-C852   | -85.9(13)  |
| C832-P62-C842-C852   | 167.1(12)  |
| Pt(2)-P62-C842-C852  | 55.0(12)   |
| C902-P62-C842-C892   | 92.2(14)   |
| C832-P62-C842-C892   | -14.9(16)  |
| Pt(2)-P62-C842-C892  | -127.0(10) |
| C892-C842-C852-C862  | 0.0        |
| P62-C842-C852-C862   | 178.1(15)  |
| C842-C852-C862-C872  | 0.0        |
| C852-C862-C872-C882  | 0.0        |
| C862-C872-C882-C892  | 0.0        |
| C872-C882-C892-C842  | 0.0        |
| C852-C842-C892-C882  | 0.0        |
| P62-C842-C892-C882   | -178.0(16) |
| C842-P62-C902-C912   | 11.7(15)   |
| C832-P62-C902-C912   | 123.4(14)  |
| Pt(2)-P62-C902-C912  | -122.3(11) |
| C842-P62-C902-C952   | -164.2(13) |
| C832-P62-C902-C952   | -52.5(16)  |
| Pt(2)-P62-C902-C952  | 61.8(16)   |
| C952-C902-C912-C922  | 0.0        |
| P62-C902-C912-C922   | -175.8(17) |
| C902-C912-C922-C932  | 0.0        |
| C912-C922-C932-C942  | 0.0        |
| C922-C932-C942-C952  | 0.0        |
| C932-C942-C952-C902  | 0.0        |
| C912-C902-C952-C942  | 0.0        |
| P62-C902-C952-C942   | 175.9(17)  |

---

**Table S14.** Crystallographic data and collection parameters for **9**.

| <b>9</b>                                  |                                                                    |
|-------------------------------------------|--------------------------------------------------------------------|
| Empirical Formula                         | C <sub>40</sub> H <sub>50</sub> BF <sub>4</sub> OP <sub>3</sub> Pt |
| FW                                        | 921.61                                                             |
| Space Group                               | Triclinic, P-1                                                     |
| <i>A</i>                                  | 10.7092(9)                                                         |
| <i>B</i>                                  | 11.3859(9)                                                         |
| <i>C</i>                                  | 18.7092(15)                                                        |
| <i>V</i> , Å <sup>3</sup>                 | 2093.4(3)                                                          |
| <i>Z</i>                                  | 2                                                                  |
| <i>T</i> , K                              | 100(2)                                                             |
| <i>D</i> <sub>c</sub> , Mg/m <sup>3</sup> | 1.462                                                              |
| <i>λ</i> , Å                              | Mo Kα (0.71073)                                                    |
| <i>μ</i> , mm <sup>-1</sup>               | 3.513                                                              |
| <i>R</i> <sub>f</sub> <sup>a</sup>        | 0.0328                                                             |
| <i>R</i> <sub>w</sub> <sup>b</sup>        | 0.0836                                                             |
| GOF <sup>c</sup>                          | 1.086                                                              |

<sup>a</sup> $R_f = \Sigma(F_o - F_c)/\Sigma F_o$ . <sup>b</sup> $R_w = [\Sigma\omega(F_o - F_c)^2/\Sigma\omega F_o^2]^{1/2}$ . <sup>c</sup>GOF =  $[\Sigma\omega(F_o - F_c)^2/(n - p)]^{1/2}$ , where *n* = number of reflections and *p* = number of parameters.

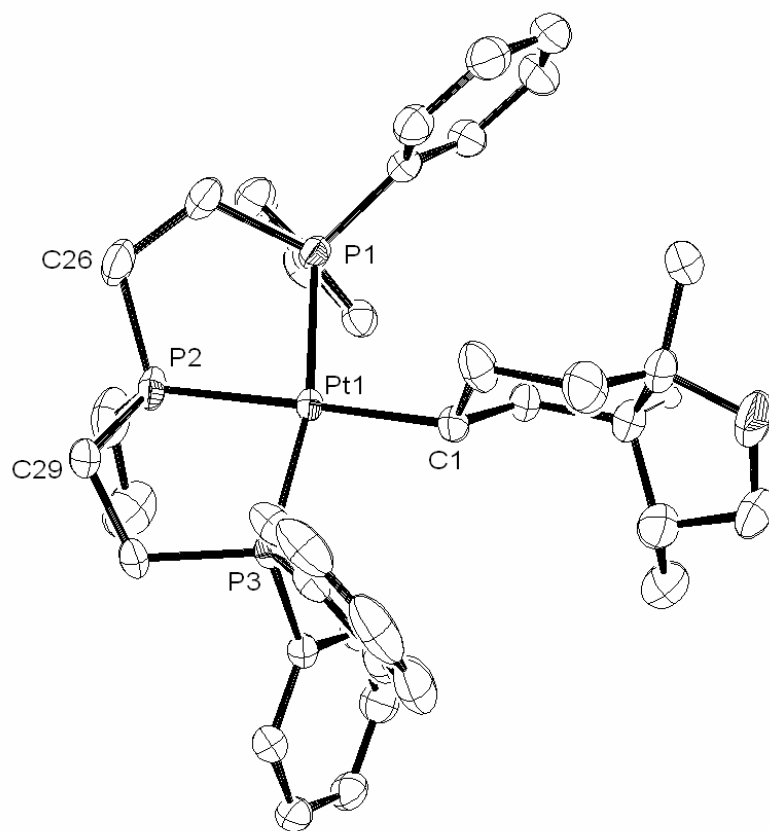

**Figure S5.** ORTEP representation of **9**.  $\text{BF}_4^-$  counter ion and solvent molecule not shown.

**Table S15.** Atomic coordinates ( $\times 10^4$ ) and equivalent isotropic displacement parameters ( $\text{\AA}^2 \times 10^3$ ) for **9**.  $U(\text{eq})$  is defined as one third of the trace of the orthogonalized  $U_{ij}$  tensor.

|       | x        | y        | z        | U(eq)  |
|-------|----------|----------|----------|--------|
| Pt(1) | -706(1)  | 7493(1)  | 7095(1)  | 21(1)  |
| P(1)  | -2117(1) | 7994(1)  | 7744(1)  | 25(1)  |
| P(2)  | -2413(1) | 7498(1)  | 6081(1)  | 30(1)  |
| P(3)  | 237(1)   | 6790(1)  | 6244(1)  | 24(1)  |
| C(1)  | 829(3)   | 7256(4)  | 7980(2)  | 30(1)  |
| C(2)  | 1483(4)  | 8362(4)  | 8610(2)  | 35(1)  |
| C(3)  | 2625(4)  | 8144(4)  | 9220(2)  | 41(1)  |
| C(4)  | 2200(4)  | 6942(5)  | 9522(2)  | 48(1)  |
| C(6)  | 4519(5)  | 7400(5)  | 9622(3)  | 51(1)  |
| C(7)  | 3903(4)  | 8023(5)  | 8995(2)  | 45(1)  |
| C(8)  | 1453(5)  | 5827(5)  | 8884(3)  | 49(1)  |
| C(9)  | 325(5)   | 6065(4)  | 8294(2)  | 39(1)  |
| C(10) | 1412(5)  | 7035(6)  | 10096(2) | 56(1)  |
| C(11) | 4827(5)  | 9253(5)  | 8901(3)  | 57(1)  |
| C(12) | -2128(3) | 7717(3)  | 8684(2)  | 28(1)  |
| C(13) | -2544(4) | 6488(4)  | 8816(2)  | 34(1)  |
| C(14) | -2500(4) | 6258(4)  | 9539(2)  | 41(1)  |
| C(15) | -2052(4) | 7241(4)  | 10136(2) | 43(1)  |
| C(16) | -1637(5) | 8467(4)  | 10016(2) | 42(1)  |
| C(17) | -1684(4) | 8703(4)  | 9293(2)  | 33(1)  |
| O(18) | 3472(4)  | 6782(4)  | 9919(2)  | 65(1)  |
| C(19) | -2003(3) | 9625(3)  | 7767(2)  | 28(1)  |
| C(20) | -724(4)  | 10503(3) | 7912(2)  | 32(1)  |
| C(21) | -581(4)  | 11769(4) | 7941(2)  | 39(1)  |
| C(22) | -1716(5) | 12157(4) | 7807(2)  | 45(1)  |
| C(23) | -2997(5) | 11286(4) | 7652(3)  | 49(1)  |
| C(24) | -3141(4) | 10030(4) | 7632(2)  | 39(1)  |
| C(25) | -3830(3) | 7065(3)  | 7161(2)  | 34(1)  |
| C(26) | -4030(4) | 7180(4)  | 6331(2)  | 43(1)  |
| C(27) | -2413(5) | 8911(5)  | 5679(3)  | 57(1)  |
| C(28) | -1204(6) | 9497(6)  | 5439(4)  | 67(2)  |
| C(29) | -2486(4) | 6240(4)  | 5358(2)  | 38(1)  |
| C(30) | -1038(4) | 6354(4)  | 5312(2)  | 34(1)  |
| C(31) | 1714(3)  | 7905(3)  | 6109(2)  | 25(1)  |
| C(32) | 2266(3)  | 7648(3)  | 5526(2)  | 29(1)  |
| C(33) | 3368(4)  | 8534(3)  | 5418(2)  | 32(1)  |
| C(34) | 3925(4)  | 9690(4)  | 5891(2)  | 35(1)  |
| C(35) | 3376(4)  | 9953(4)  | 6468(2)  | 39(1)  |
| C(36) | 2277(4)  | 9066(3)  | 6580(2)  | 32(1)  |
| C(37) | 709(4)   | 5397(3)  | 6393(2)  | 29(1)  |
| C(38) | 2058(4)  | 5403(4)  | 6562(2)  | 36(1)  |
| C(39) | 2348(6)  | 4294(4)  | 6663(2)  | 48(1)  |
| C(40) | 1305(7)  | 3203(5)  | 6597(2)  | 57(1)  |
| C(41) | -24(6)   | 3198(4)  | 6440(2)  | 50(1)  |
| C(42) | -333(5)  | 4295(3)  | 6342(2)  | 38(1)  |
| B(1)  | 4273(4)  | 6514(4)  | 3585(3)  | 38(1)  |
| F(1)  | 5334(6)  | 7170(4)  | 3383(4)  | 132(2) |
| F(2)  | 4658(5)  | 5801(6)  | 4047(4)  | 157(3) |

|      |         |         |         |        |
|------|---------|---------|---------|--------|
| F(4) | 3346(6) | 5739(5) | 2958(4) | 162(3) |
| F(3) | 3629(4) | 7364(4) | 3803(2) | 80(1)  |

---

**Table S16.** Bond lengths [ $\text{\AA}$ ] and angles [ $^\circ$ ] for **9**.

---

|             |           |
|-------------|-----------|
| Pt(1)-C(1)  | 2.134(3)  |
| Pt(1)-P(3)  | 2.2722(8) |
| Pt(1)-P(2)  | 2.3016(8) |
| Pt(1)-P(1)  | 2.3032(8) |
| P(1)-C(12)  | 1.819(3)  |
| P(1)-C(19)  | 1.822(3)  |
| P(1)-C(25)  | 1.846(4)  |
| P(2)-C(29)  | 1.842(4)  |
| P(2)-C(27)  | 1.843(5)  |
| P(2)-C(26)  | 1.850(4)  |
| P(3)-C(31)  | 1.818(3)  |
| P(3)-C(37)  | 1.822(4)  |
| P(3)-C(30)  | 1.861(3)  |
| C(1)-C(2)   | 1.512(5)  |
| C(1)-C(9)   | 1.541(6)  |
| C(2)-C(3)   | 1.556(5)  |
| C(3)-C(4)   | 1.525(7)  |
| C(3)-C(7)   | 1.562(6)  |
| C(4)-O(18)  | 1.457(5)  |
| C(4)-C(10)  | 1.528(6)  |
| C(4)-C(8)   | 1.534(7)  |
| C(6)-O(18)  | 1.412(6)  |
| C(6)-C(7)   | 1.540(6)  |
| C(7)-C(11)  | 1.526(7)  |
| C(8)-C(9)   | 1.534(6)  |
| C(12)-C(17) | 1.405(5)  |
| C(12)-C(13) | 1.410(5)  |
| C(13)-C(14) | 1.397(6)  |
| C(14)-C(15) | 1.388(6)  |
| C(15)-C(16) | 1.399(6)  |
| C(16)-C(17) | 1.397(5)  |
| C(19)-C(24) | 1.397(5)  |
| C(19)-C(20) | 1.397(5)  |
| C(20)-C(21) | 1.400(5)  |
| C(21)-C(22) | 1.382(6)  |
| C(22)-C(23) | 1.394(7)  |
| C(23)-C(24) | 1.390(6)  |
| C(25)-C(26) | 1.541(6)  |
| C(27)-C(28) | 1.475(8)  |
| C(29)-C(30) | 1.542(5)  |
| C(31)-C(36) | 1.400(5)  |
| C(31)-C(32) | 1.403(4)  |
| C(32)-C(33) | 1.392(5)  |
| C(33)-C(34) | 1.397(5)  |
| C(34)-C(35) | 1.392(6)  |
| C(35)-C(36) | 1.394(5)  |
| C(37)-C(38) | 1.401(5)  |
| C(37)-C(42) | 1.403(5)  |



|             |          |
|-------------|----------|
| C(38)-C(39) | 1.402(6) |
| C(39)-C(40) | 1.391(8) |
| C(40)-C(41) | 1.381(8) |
| C(41)-C(42) | 1.397(6) |
| B(1)-F(2)   | 1.315(6) |
| B(1)-F(1)   | 1.333(6) |
| B(1)-F(4)   | 1.375(7) |
| B(1)-F(3)   | 1.418(6) |

|                   |            |
|-------------------|------------|
| C(1)-Pt(1)-P(3)   | 90.04(9)   |
| C(1)-Pt(1)-P(2)   | 173.01(10) |
| P(3)-Pt(1)-P(2)   | 85.87(3)   |
| C(1)-Pt(1)-P(1)   | 101.07(9)  |
| P(3)-Pt(1)-P(1)   | 166.86(3)  |
| P(2)-Pt(1)-P(1)   | 82.35(3)   |
| C(12)-P(1)-C(19)  | 105.17(15) |
| C(12)-P(1)-C(25)  | 104.01(17) |
| C(19)-P(1)-C(25)  | 107.12(17) |
| C(12)-P(1)-Pt(1)  | 125.26(11) |
| C(19)-P(1)-Pt(1)  | 110.17(11) |
| C(25)-P(1)-Pt(1)  | 103.82(12) |
| C(29)-P(2)-C(27)  | 109.9(2)   |
| C(29)-P(2)-C(26)  | 110.85(18) |
| C(27)-P(2)-C(26)  | 99.6(2)    |
| C(29)-P(2)-Pt(1)  | 104.73(13) |
| C(27)-P(2)-Pt(1)  | 121.81(16) |
| C(26)-P(2)-Pt(1)  | 109.86(13) |
| C(31)-P(3)-C(37)  | 105.96(16) |
| C(31)-P(3)-C(30)  | 104.83(15) |
| C(37)-P(3)-C(30)  | 105.07(17) |
| C(31)-P(3)-Pt(1)  | 116.13(11) |
| C(37)-P(3)-Pt(1)  | 115.68(10) |
| C(30)-P(3)-Pt(1)  | 108.12(12) |
| C(2)-C(1)-C(9)    | 110.1(3)   |
| C(2)-C(1)-Pt(1)   | 114.2(2)   |
| C(9)-C(1)-Pt(1)   | 112.4(2)   |
| C(1)-C(2)-C(3)    | 111.4(3)   |
| C(4)-C(3)-C(2)    | 114.7(3)   |
| C(4)-C(3)-C(7)    | 100.8(4)   |
| C(2)-C(3)-C(7)    | 117.5(3)   |
| O(18)-C(4)-C(3)   | 104.5(4)   |
| O(18)-C(4)-C(10)  | 106.8(3)   |
| C(3)-C(4)-C(10)   | 112.8(4)   |
| O(18)-C(4)-C(8)   | 108.3(4)   |
| C(3)-C(4)-C(8)    | 111.3(3)   |
| C(10)-C(4)-C(8)   | 112.7(4)   |
| O(18)-C(6)-C(7)   | 107.8(3)   |
| C(11)-C(7)-C(6)   | 116.1(4)   |
| C(11)-C(7)-C(3)   | 113.5(4)   |
| C(6)-C(7)-C(3)    | 101.4(4)   |
| C(4)-C(8)-C(9)    | 112.8(4)   |
| C(8)-C(9)-C(1)    | 112.8(4)   |
| C(17)-C(12)-C(13) | 118.8(3)   |
| C(17)-C(12)-P(1)  | 121.4(3)   |
| C(13)-C(12)-P(1)  | 119.8(3)   |

|                   |          |
|-------------------|----------|
| C(14)-C(13)-C(12) | 120.5(4) |
| C(15)-C(14)-C(13) | 120.0(4) |
| C(14)-C(15)-C(16) | 120.3(4) |
| C(17)-C(16)-C(15) | 119.9(4) |
| C(16)-C(17)-C(12) | 120.5(4) |
| C(6)-O(18)-C(4)   | 109.8(3) |
| C(24)-C(19)-C(20) | 118.7(3) |
| C(24)-C(19)-P(1)  | 122.8(3) |
| C(20)-C(19)-P(1)  | 118.5(3) |
| C(19)-C(20)-C(21) | 120.7(4) |
| C(22)-C(21)-C(20) | 119.9(4) |
| C(21)-C(22)-C(23) | 119.8(4) |
| C(24)-C(23)-C(22) | 120.4(4) |
| C(23)-C(24)-C(19) | 120.4(4) |
| C(26)-C(25)-P(1)  | 112.1(3) |
| C(25)-C(26)-P(2)  | 111.4(2) |
| C(28)-C(27)-P(2)  | 115.7(4) |
| C(30)-C(29)-P(2)  | 109.2(2) |
| C(29)-C(30)-P(3)  | 113.2(2) |
| C(36)-C(31)-C(32) | 119.3(3) |
| C(36)-C(31)-P(3)  | 119.1(2) |
| C(32)-C(31)-P(3)  | 121.6(2) |
| C(33)-C(32)-C(31) | 120.5(3) |
| C(32)-C(33)-C(34) | 119.9(3) |
| C(35)-C(34)-C(33) | 119.9(3) |
| C(34)-C(35)-C(36) | 120.4(3) |
| C(35)-C(36)-C(31) | 120.1(3) |
| C(38)-C(37)-C(42) | 120.1(4) |
| C(38)-C(37)-P(3)  | 122.3(3) |
| C(42)-C(37)-P(3)  | 117.7(3) |
| C(37)-C(38)-C(39) | 119.3(4) |
| C(40)-C(39)-C(38) | 120.1(5) |
| C(41)-C(40)-C(39) | 120.7(4) |
| C(40)-C(41)-C(42) | 120.0(4) |
| C(41)-C(42)-C(37) | 119.8(4) |
| F(2)-B(1)-F(1)    | 109.5(5) |
| F(2)-B(1)-F(4)    | 107.0(5) |
| F(1)-B(1)-F(4)    | 108.3(6) |
| F(2)-B(1)-F(3)    | 120.0(6) |
| F(1)-B(1)-F(3)    | 106.8(4) |
| F(4)-B(1)-F(3)    | 104.8(4) |

**Table S17.** Anisotropic displacement parameters ( $\text{\AA}^2 \times 10^3$ ) for **9**. The anisotropic displacement factor exponent takes the form:  $-2\pi^2 [ h^2 a^* 2 U^{11} + \dots + 2 h k a^* b^* U^{12} ]$

|       | $U^{11}$ | $U^{22}$ | $U^{33}$ | $U^{23}$ | $U^{13}$ | $U^{12}$ |
|-------|----------|----------|----------|----------|----------|----------|
| Pt(1) | 18(1)    | 26(1)    | 17(1)    | 2(1)     | 1(1)     | 7(1)     |
| P(1)  | 20(1)    | 28(1)    | 25(1)    | 2(1)     | 4(1)     | 9(1)     |
| P(2)  | 26(1)    | 33(1)    | 25(1)    | 7(1)     | -4(1)    | 7(1)     |
| P(3)  | 22(1)    | 29(1)    | 17(1)    | 2(1)     | 4(1)     | 5(1)     |
| C(1)  | 27(2)    | 46(2)    | 21(1)    | 7(1)     | 5(1)     | 19(1)    |
| C(2)  | 24(2)    | 48(2)    | 24(2)    | 6(1)     | 2(1)     | 5(1)     |

|       |        |        |        |        |        |       |
|-------|--------|--------|--------|--------|--------|-------|
| C(3)  | 26(2)  | 60(2)  | 32(2)  | 7(2)   | 1(1)   | 10(2) |
| C(4)  | 29(2)  | 81(3)  | 37(2)  | 25(2)  | 4(2)   | 22(2) |
| C(6)  | 33(2)  | 73(3)  | 47(2)  | 11(2)  | 1(2)   | 28(2) |
| C(7)  | 37(2)  | 55(2)  | 39(2)  | 1(2)   | 6(2)   | 15(2) |
| C(8)  | 55(3)  | 64(3)  | 43(2)  | 21(2)  | 13(2)  | 38(2) |
| C(9)  | 54(2)  | 41(2)  | 27(2)  | 7(1)   | 6(2)   | 28(2) |
| C(10) | 39(2)  | 95(4)  | 31(2)  | 22(2)  | 8(2)   | 17(2) |
| C(11) | 36(2)  | 73(3)  | 57(3)  | 15(2)  | 11(2)  | 10(2) |
| C(12) | 22(1)  | 35(2)  | 29(2)  | 7(1)   | 8(1)   | 11(1) |
| C(13) | 30(2)  | 37(2)  | 38(2)  | 9(1)   | 8(1)   | 12(1) |
| C(14) | 35(2)  | 46(2)  | 46(2)  | 20(2)  | 13(2)  | 16(2) |
| C(15) | 38(2)  | 60(3)  | 35(2)  | 17(2)  | 13(2)  | 20(2) |
| C(16) | 46(2)  | 52(2)  | 29(2)  | 5(2)   | 12(2)  | 17(2) |
| C(17) | 34(2)  | 38(2)  | 31(2)  | 7(1)   | 11(1)  | 12(1) |
| O(18) | 38(2)  | 105(3) | 55(2)  | 38(2)  | 0(2)   | 30(2) |
| C(19) | 30(2)  | 31(2)  | 24(1)  | 5(1)   | 6(1)   | 14(1) |
| C(20) | 34(2)  | 33(2)  | 29(2)  | 8(1)   | 8(1)   | 11(1) |
| C(21) | 47(2)  | 34(2)  | 31(2)  | 7(1)   | 9(2)   | 7(2)  |
| C(22) | 66(3)  | 33(2)  | 38(2)  | 10(2)  | 13(2)  | 21(2) |
| C(23) | 52(3)  | 47(2)  | 58(3)  | 13(2)  | 15(2)  | 31(2) |
| C(24) | 34(2)  | 41(2)  | 46(2)  | 7(2)   | 9(2)   | 19(2) |
| C(25) | 21(1)  | 36(2)  | 41(2)  | -3(1)  | 2(1)   | 9(1)  |
| C(26) | 26(2)  | 59(2)  | 38(2)  | -3(2)  | -4(1)  | 19(2) |
| C(27) | 51(3)  | 54(3)  | 53(3)  | 24(2)  | -7(2)  | 12(2) |
| C(28) | 54(3)  | 65(3)  | 84(4)  | 37(3)  | 13(3)  | 18(3) |
| C(29) | 24(2)  | 54(2)  | 22(1)  | -2(1)  | 1(1)   | 1(2)  |
| C(30) | 29(2)  | 47(2)  | 17(1)  | -2(1)  | 1(1)   | 4(1)  |
| C(31) | 22(1)  | 29(1)  | 21(1)  | 4(1)   | 4(1)   | 6(1)  |
| C(32) | 30(2)  | 31(2)  | 24(1)  | 4(1)   | 7(1)   | 9(1)  |
| C(33) | 29(2)  | 41(2)  | 29(2)  | 12(1)  | 11(1)  | 13(1) |
| C(34) | 25(2)  | 40(2)  | 37(2)  | 12(1)  | 8(1)   | 5(1)  |
| C(35) | 33(2)  | 36(2)  | 37(2)  | -1(1)  | 7(2)   | 1(1)  |
| C(36) | 29(2)  | 35(2)  | 27(2)  | -2(1)  | 6(1)   | 6(1)  |
| C(37) | 38(2)  | 32(2)  | 18(1)  | 2(1)   | 9(1)   | 10(1) |
| C(38) | 43(2)  | 45(2)  | 22(1)  | 5(1)   | 5(1)   | 20(2) |
| C(39) | 68(3)  | 55(2)  | 27(2)  | 8(2)   | 6(2)   | 36(2) |
| C(40) | 106(4) | 47(2)  | 26(2)  | 11(2)  | 15(2)  | 40(3) |
| C(41) | 85(4)  | 35(2)  | 29(2)  | 10(2)  | 23(2)  | 14(2) |
| C(42) | 54(2)  | 33(2)  | 25(2)  | 3(1)   | 17(2)  | 6(2)  |
| B(1)  | 30(2)  | 29(2)  | 57(3)  | 16(2)  | 12(2)  | 7(2)  |
| F(1)  | 128(4) | 80(3)  | 269(7) | 89(4)  | 148(5) | 59(3) |
| F(2)  | 78(3)  | 192(6) | 183(6) | 154(5) | 0(3)   | 5(3)  |
| F(4)  | 136(5) | 98(4)  | 201(6) | -75(4) | -51(4) | 73(4) |
| F(3)  | 65(2)  | 102(3) | 66(2)  | -23(2) | 23(2)  | 26(2) |

---

**Table S18.** Hydrogen coordinates ( $\times 10^4$ ) and isotropic displacement parameters ( $\text{\AA}^2 \times 10^3$ ) for **9**.

|        | x     | y     | z     | U(eq) |
|--------|-------|-------|-------|-------|
| H(1)   | 1560  | 7151  | 7757  | 36    |
| H(2A)  | 787   | 8517  | 8838  | 42    |
| H(2B)  | 1868  | 9109  | 8406  | 42    |
| H(3)   | 2934  | 8852  | 9650  | 50    |
| H(6A)  | 4915  | 6799  | 9420  | 61    |
| H(6B)  | 5245  | 8034  | 10018 | 61    |
| H(7)   | 3598  | 7428  | 8511  | 54    |
| H(8A)  | 1054  | 5095  | 9095  | 59    |
| H(8B)  | 2112  | 5631  | 8640  | 59    |
| H(9A)  | -404  | 6132  | 8520  | 47    |
| H(9B)  | -64   | 5345  | 7877  | 47    |
| H(10A) | 1336  | 6315  | 10349 | 83    |
| H(10B) | 505   | 7049  | 9841  | 83    |
| H(10C) | 1891  | 7800  | 10464 | 83    |
| H(11A) | 5058  | 9873  | 9353  | 86    |
| H(11B) | 4359  | 9542  | 8470  | 86    |
| H(11C) | 5657  | 9134  | 8819  | 86    |
| H(13)  | -2858 | 5812  | 8409  | 41    |
| H(14)  | -2776 | 5427  | 9624  | 49    |
| H(15)  | -2027 | 7082  | 10627 | 51    |
| H(16)  | -1323 | 9138  | 10426 | 50    |
| H(17)  | -1415 | 9537  | 9212  | 40    |
| H(20)  | 57    | 10239 | 7993  | 39    |
| H(21)  | 294   | 12361 | 8051  | 46    |
| H(22)  | -1623 | 13014 | 7821  | 54    |
| H(23)  | -3777 | 11551 | 7558  | 58    |
| H(24)  | -4018 | 9443  | 7526  | 47    |
| H(25A) | -3984 | 6181  | 7209  | 41    |
| H(25B) | -4509 | 7346  | 7346  | 41    |
| H(26A) | -4417 | 7861  | 6229  | 51    |
| H(26B) | -4681 | 6398  | 6015  | 51    |
| H(27A) | -3219 | 8700  | 5241  | 68    |
| H(27B) | -2510 | 9530  | 6054  | 68    |
| H(28A) | -387  | 9616  | 5847  | 101   |
| H(28B) | -1232 | 10304 | 5309  | 101   |
| H(28C) | -1188 | 8959  | 5001  | 101   |
| H(29A) | -2902 | 5424  | 5484  | 45    |
| H(29B) | -3049 | 6299  | 4868  | 45    |
| H(30A) | -771  | 6987  | 5004  | 41    |
| H(30B) | -1037 | 5549  | 5058  | 41    |
| H(32)  | 1885  | 6864  | 5201  | 34    |
| H(33)  | 3742  | 8352  | 5024  | 38    |
| H(34)  | 4677  | 10296 | 5819  | 42    |
| H(35)  | 3753  | 10742 | 6787  | 46    |
| H(36)  | 1910  | 9251  | 6976  | 38    |
| H(38)  | 2768  | 6150  | 6607  | 43    |
| H(39)  | 3260  | 4288  | 6777  | 57    |
| H(40)  | 1508  | 2453  | 6661  | 68    |
| H(41)  | -729  | 2448  | 6398  | 59    |

H(42)                                      -1245                                      4296                                      6241                                      46

---

**Table S19.** Torsion angles [°] for **9**.

|                       |             |
|-----------------------|-------------|
| C(1)-Pt(1)-P(1)-C(12) | -17.64(18)  |
| P(3)-Pt(1)-P(1)-C(12) | 129.65(18)  |
| P(2)-Pt(1)-P(1)-C(12) | 156.18(15)  |
| C(1)-Pt(1)-P(1)-C(19) | 109.30(16)  |
| P(3)-Pt(1)-P(1)-C(19) | -103.41(17) |
| P(2)-Pt(1)-P(1)-C(19) | -76.87(12)  |
| C(1)-Pt(1)-P(1)-C(25) | -136.28(17) |
| P(3)-Pt(1)-P(1)-C(25) | 11.0(2)     |
| P(2)-Pt(1)-P(1)-C(25) | 37.54(14)   |
| C(1)-Pt(1)-P(2)-C(29) | -24.4(8)    |
| P(3)-Pt(1)-P(2)-C(29) | 30.00(13)   |
| P(1)-Pt(1)-P(2)-C(29) | -144.15(13) |
| C(1)-Pt(1)-P(2)-C(27) | -149.7(8)   |
| P(3)-Pt(1)-P(2)-C(27) | -95.3(2)    |
| P(1)-Pt(1)-P(2)-C(27) | 90.5(2)     |
| C(1)-Pt(1)-P(2)-C(26) | 94.7(8)     |
| P(3)-Pt(1)-P(2)-C(26) | 149.10(16)  |
| P(1)-Pt(1)-P(2)-C(26) | -25.06(16)  |
| C(1)-Pt(1)-P(3)-C(31) | -79.44(15)  |
| P(2)-Pt(1)-P(3)-C(31) | 106.24(12)  |
| P(1)-Pt(1)-P(3)-C(31) | 132.59(16)  |
| C(1)-Pt(1)-P(3)-C(37) | 45.70(17)   |
| P(2)-Pt(1)-P(3)-C(37) | -128.62(13) |
| P(1)-Pt(1)-P(3)-C(37) | -102.27(18) |
| C(1)-Pt(1)-P(3)-C(30) | 163.15(17)  |
| P(2)-Pt(1)-P(3)-C(30) | -11.17(14)  |
| P(1)-Pt(1)-P(3)-C(30) | 15.2(2)     |
| P(3)-Pt(1)-C(1)-C(2)  | 132.1(2)    |
| P(2)-Pt(1)-C(1)-C(2)  | -173.7(6)   |
| P(1)-Pt(1)-C(1)-C(2)  | -54.9(3)    |
| P(3)-Pt(1)-C(1)-C(9)  | -101.5(2)   |
| P(2)-Pt(1)-C(1)-C(9)  | -47.3(9)    |
| P(1)-Pt(1)-C(1)-C(9)  | 71.5(2)     |
| C(9)-C(1)-C(2)-C(3)   | 54.4(4)     |
| Pt(1)-C(1)-C(2)-C(3)  | -178.0(2)   |
| C(1)-C(2)-C(3)-C(4)   | -52.7(5)    |
| C(1)-C(2)-C(3)-C(7)   | 65.4(5)     |
| C(2)-C(3)-C(4)-O(18)  | 165.4(4)    |
| C(7)-C(3)-C(4)-O(18)  | 38.2(4)     |
| C(2)-C(3)-C(4)-C(10)  | -79.0(5)    |
| C(7)-C(3)-C(4)-C(10)  | 153.7(3)    |
| C(2)-C(3)-C(4)-C(8)   | 48.8(5)     |
| C(7)-C(3)-C(4)-C(8)   | -78.4(4)    |
| O(18)-C(6)-C(7)-C(11) | 146.5(5)    |
| O(18)-C(6)-C(7)-C(3)  | 23.1(5)     |
| C(4)-C(3)-C(7)-C(11)  | -161.7(4)   |
| C(2)-C(3)-C(7)-C(11)  | 72.9(5)     |
| C(4)-C(3)-C(7)-C(6)   | -36.5(4)    |
| C(2)-C(3)-C(7)-C(6)   | -161.9(4)   |
| O(18)-C(4)-C(8)-C(9)  | -163.2(4)   |

|                         |           |
|-------------------------|-----------|
| C(3)-C(4)-C(8)-C(9)     | -48.9(5)  |
| C(10)-C(4)-C(8)-C(9)    | 79.0(5)   |
| C(4)-C(8)-C(9)-C(1)     | 53.9(5)   |
| C(2)-C(1)-C(9)-C(8)     | -56.3(4)  |
| Pt(1)-C(1)-C(9)-C(8)    | 175.1(3)  |
| C(19)-P(1)-C(12)-C(17)  | -18.1(3)  |
| C(25)-P(1)-C(12)-C(17)  | -130.5(3) |
| Pt(1)-P(1)-C(12)-C(17)  | 110.9(3)  |
| C(19)-P(1)-C(12)-C(13)  | 164.1(3)  |
| C(25)-P(1)-C(12)-C(13)  | 51.7(3)   |
| Pt(1)-P(1)-C(12)-C(13)  | -66.9(3)  |
| C(17)-C(12)-C(13)-C(14) | -0.8(5)   |
| P(1)-C(12)-C(13)-C(14)  | 177.0(3)  |
| C(12)-C(13)-C(14)-C(15) | 0.4(6)    |
| C(13)-C(14)-C(15)-C(16) | -0.3(6)   |
| C(14)-C(15)-C(16)-C(17) | 0.6(6)    |
| C(15)-C(16)-C(17)-C(12) | -1.0(6)   |
| C(13)-C(12)-C(17)-C(16) | 1.1(5)    |
| P(1)-C(12)-C(17)-C(16)  | -176.7(3) |
| C(7)-C(6)-O(18)-C(4)    | 0.7(6)    |
| C(3)-C(4)-O(18)-C(6)    | -25.2(5)  |
| C(10)-C(4)-O(18)-C(6)   | -145.0(5) |
| C(8)-C(4)-O(18)-C(6)    | 93.5(5)   |
| C(12)-P(1)-C(19)-C(24)  | -87.2(3)  |
| C(25)-P(1)-C(19)-C(24)  | 23.0(4)   |
| Pt(1)-P(1)-C(19)-C(24)  | 135.3(3)  |
| C(12)-P(1)-C(19)-C(20)  | 94.0(3)   |
| C(25)-P(1)-C(19)-C(20)  | -155.7(3) |
| Pt(1)-P(1)-C(19)-C(20)  | -43.4(3)  |
| C(24)-C(19)-C(20)-C(21) | 1.6(5)    |
| P(1)-C(19)-C(20)-C(21)  | -179.6(3) |
| C(19)-C(20)-C(21)-C(22) | -1.5(6)   |
| C(20)-C(21)-C(22)-C(23) | 0.6(6)    |
| C(21)-C(22)-C(23)-C(24) | 0.2(7)    |
| C(22)-C(23)-C(24)-C(19) | -0.1(7)   |
| C(20)-C(19)-C(24)-C(23) | -0.8(6)   |
| P(1)-C(19)-C(24)-C(23)  | -179.6(3) |
| C(12)-P(1)-C(25)-C(26)  | 179.8(3)  |
| C(19)-P(1)-C(25)-C(26)  | 68.8(3)   |
| Pt(1)-P(1)-C(25)-C(26)  | -47.8(3)  |
| P(1)-C(25)-C(26)-P(2)   | 28.5(4)   |
| C(29)-P(2)-C(26)-C(25)  | 118.6(3)  |
| C(27)-P(2)-C(26)-C(25)  | -125.7(3) |
| Pt(1)-P(2)-C(26)-C(25)  | 3.3(3)    |
| C(29)-P(2)-C(27)-C(28)  | -66.4(5)  |
| C(26)-P(2)-C(27)-C(28)  | 177.2(5)  |
| Pt(1)-P(2)-C(27)-C(28)  | 56.5(5)   |
| C(27)-P(2)-C(29)-C(30)  | 85.6(3)   |
| C(26)-P(2)-C(29)-C(30)  | -165.3(3) |
| Pt(1)-P(2)-C(29)-C(30)  | -46.9(3)  |
| P(2)-C(29)-C(30)-P(3)   | 40.0(4)   |
| C(31)-P(3)-C(30)-C(29)  | -139.2(3) |
| C(37)-P(3)-C(30)-C(29)  | 109.4(3)  |
| Pt(1)-P(3)-C(30)-C(29)  | -14.7(3)  |
| C(37)-P(3)-C(31)-C(36)  | -123.1(3) |
| C(30)-P(3)-C(31)-C(36)  | 126.0(3)  |

|                         |           |
|-------------------------|-----------|
| Pt(1)-P(3)-C(31)-C(36)  | 6.8(3)    |
| C(37)-P(3)-C(31)-C(32)  | 59.6(3)   |
| C(30)-P(3)-C(31)-C(32)  | -51.2(3)  |
| Pt(1)-P(3)-C(31)-C(32)  | -170.4(2) |
| C(36)-C(31)-C(32)-C(33) | 0.5(5)    |
| P(3)-C(31)-C(32)-C(33)  | 177.7(3)  |
| C(31)-C(32)-C(33)-C(34) | -0.4(5)   |
| C(32)-C(33)-C(34)-C(35) | 0.0(6)    |
| C(33)-C(34)-C(35)-C(36) | 0.4(6)    |
| C(34)-C(35)-C(36)-C(31) | -0.3(6)   |
| C(32)-C(31)-C(36)-C(35) | -0.1(5)   |
| P(3)-C(31)-C(36)-C(35)  | -177.4(3) |
| C(31)-P(3)-C(37)-C(38)  | 15.0(3)   |
| C(30)-P(3)-C(37)-C(38)  | 125.7(3)  |
| Pt(1)-P(3)-C(37)-C(38)  | -115.2(3) |
| C(31)-P(3)-C(37)-C(42)  | -165.7(2) |
| C(30)-P(3)-C(37)-C(42)  | -55.0(3)  |
| Pt(1)-P(3)-C(37)-C(42)  | 64.1(3)   |
| C(42)-C(37)-C(38)-C(39) | 1.3(5)    |
| P(3)-C(37)-C(38)-C(39)  | -179.4(3) |
| C(37)-C(38)-C(39)-C(40) | -0.1(6)   |
| C(38)-C(39)-C(40)-C(41) | -0.7(6)   |
| C(39)-C(40)-C(41)-C(42) | 0.3(6)    |
| C(40)-C(41)-C(42)-C(37) | 0.9(6)    |
| C(38)-C(37)-C(42)-C(41) | -1.7(5)   |
| P(3)-C(37)-C(42)-C(41)  | 179.0(3)  |

---
